# Supplementary material for: Design, Synthesis and Anticancer Evaluation of Nitroimidazole Radiosensitisers
Source: MDPI journal article supplement (doi:10.3390/molecules28114457), 2023-05-31
Supplement: s1 [file s1]

Table S1: Full chemical names of compounds **1 - 46**

|                                                                                                                                       |
|---------------------------------------------------------------------------------------------------------------------------------------|
| 1-Methoxy-3-(2-nitro-1 <i>H</i> -imidazol-1-yl)propan-2-ol (1)                                                                        |
| <i>N</i> -(2-Hydroxyethyl)-2-(2-nitro-1 <i>H</i> -imidazol-1-yl)acetamide (2)                                                         |
| 4-(2-(5-Nitro-1 <i>H</i> -imidazol-1-yl)ethyl)morpholine (3)                                                                          |
| 3-((2-Nitro-1 <i>H</i> -imidazol-1-yl)methoxy)butane-1,2,4-triol (4)                                                                  |
| <i>N</i> -(2-Hydroxyethyl)(2-nitro-1 <i>H</i> -imidazol-1-yl)methanesulfonamide (5)                                                   |
| <i>N</i> -(2-Hydroxyethyl)-2-(2-nitro-1 <i>H</i> -imidazol-1-yl)ethanesulfonamide (6)                                                 |
| <i>N</i> -(2-Hydroxyethyl)(5-nitro-1 <i>H</i> -imidazol-1-yl)methanesulfonamide (7)                                                   |
| <i>N</i> -(2-Hydroxyethyl)-2-(5-nitro-1 <i>H</i> -imidazol-1-yl)ethane-1-sulfonamide (8)                                              |
| 2-(((2-Nitro-1 <i>H</i> -imidazol-1-yl)methyl)sulfonamido)ethyl Dihydrogen Phosphate (9)                                              |
| 2-(((2-Nitro-1 <i>H</i> -imidazol-1-yl)ethyl)sulfonamido)ethyl Dihydrogen Phosphate (10)                                              |
| 2-(((5-Nitro-1 <i>H</i> -imidazol-1-yl)methyl)sulfonamido)ethyl Dihydrogen Phosphate (11)                                             |
| 2-((2-(5-Nitro-1 <i>H</i> -imidazol-1-yl)ethyl)sulfonamido)ethyl Dihydrogen Phosphate (12)                                            |
| <i>N</i> -(2,3-Dihydroxypropyl)-1-(2-nitro-1 <i>H</i> -imidazol-1-yl)methanesulfonamide (13)                                          |
| 1-(2-Nitro-1 <i>H</i> -imidazol-1-yl)- <i>N</i> -(1,3,4-trihydroxybutan-2-yl)methanesulfonamide (14)                                  |
| <i>N</i> -(2,3-Dihydroxypropyl)-2-(2-nitro-1 <i>H</i> -imidazol-1-yl)ethane-1-sulfonamide (15)                                        |
| <i>N</i> -(2-Morpholinoethyl)-2-(5-nitro-1 <i>H</i> -imidazol-1-yl)ethane-1-sulfonamide (16)                                          |
| 2-Hydroxy- <i>N</i> -(2-(2-nitro-1 <i>H</i> -imidazol-1-yl)ethyl)ethane-1-sulfonamide (17)                                            |
| 1-Chloro- <i>N</i> -((2,2-dimethyl-1,3-dioxolan-4-yl)methyl)methanesulfonamide (18)                                                   |
| <i>N</i> -((2,2-Dimethyl-1,3-dioxolan-4-yl)methyl)-1-(2-nitro-1 <i>H</i> -imidazol-1-yl)methanesulfonamide (19)                       |
| <i>cis</i> -2-Butene-1,4-di( <i>tert</i> -butyldimethylsilyl) ether (20)                                                              |
| 2,3-Bis((( <i>tert</i> -butyldimethylsilyl)oxy)methyl)oxirane (21)                                                                    |
| 2-Azido 1,3,4-tri((( <i>tert</i> -butyldimethylsilyl)oxy)butane (22)                                                                  |
| 2-Azido-(1,3-di((( <i>tert</i> -butyldimethylsilyl)oxy)butan-4-ol (23)                                                                |
| 2-Azido-(1,4-di((( <i>tert</i> -butyldimethylsilyl)oxy)butan-3-ol (24)                                                                |
| 1,3,4-Tri((( <i>tert</i> -butyldimethylsilyl)oxy)butan-2-amine (25)                                                                   |
| 1-Bromo- <i>N</i> -(1,3,4-tri((( <i>tert</i> -butyldimethylsilyl)oxy)butan-2-yl)methanesulfonamide (26)                               |
| 1-(2-Nitro-1 <i>H</i> -imidazol-1-yl)- <i>N</i> -(1,3,4-tri((( <i>tert</i> -butyldimethylsilyl)oxy)butan-2-yl)methanesulfonamide (27) |
| <i>S</i> -(2-(2-Nitro-1 <i>H</i> -imidazol-1-yl)ethyl) ethanethioate (28)                                                             |
| <i>N</i> -((2,2-Dimethyl-1,3-dioxolan-4-yl)methyl)-2-(2-nitro-1 <i>H</i> -imidazol-1-yl)ethane-1-sulfonamide (29)                     |
| <i>S</i> -(2-(5-Nitro-1 <i>H</i> -imidazol-1-yl)ethyl) ethanethioate (30)                                                             |
| <i>tert</i> -Butyl (2-(2-nitro-1 <i>H</i> -imidazol-1-yl)ethyl)carbamate (31)                                                         |
| 2-(2-Nitro-1 <i>H</i> -imidazol-1-yl)ethan-1-amine (32)                                                                               |
| <i>N</i> -(2-Methoxyethyl)(2-nitro-1 <i>H</i> -imidazol-1-yl)methanesulfonamide (33)                                                  |
| <i>N</i> -(2-Morpholinoethyl)-1-(2-nitro-1 <i>H</i> -imidazol-1-yl)methanesulfonamide (34)                                            |
| <i>N</i> -(2-Methoxyethyl)-2-(2-nitro-1 <i>H</i> -imidazol-1-yl)ethanesulfonamide (35)                                                |
| <i>N</i> -[2-(4-Morpholinyl)ethyl]-2-(2-nitro-1 <i>H</i> -imidazol-1-yl)ethanesulfonamide (36)                                        |
| <i>N</i> -(2-Methoxyethyl)(5-nitro-1 <i>H</i> -imidazol-1-yl)methanesulfonamide (37)                                                  |
| <i>N</i> -(2-Morpholinoethyl)-1-(5-nitro-1 <i>H</i> -imidazol-1-yl)methanesulfonamide (38)                                            |
| <i>N</i> -(2-Methoxyethyl)-2-(5-nitro-1 <i>H</i> -imidazol-1-yl)ethane-1-sulfonamide (39)                                             |
| <i>N</i> -(2-Methoxyethyl)-2-(2-methyl-5-nitro-1 <i>H</i> -imidazol-1-yl)ethanesulfonamide (40)                                       |

|                                                                                                              |
|--------------------------------------------------------------------------------------------------------------|
| <i>N</i> -(2-Hydroxyethyl)-2-(2-methyl-5-nitro-1 <i>H</i> -imidazol-1-yl)ethanesulfonamide (41)              |
| 2-(2-Methyl-5-nitro-1 <i>H</i> -imidazol-1-yl)- <i>N</i> -[2-(4-morpholinyl)ethyl]ethanesulfonamide (42)     |
| 1-Methyl-4-{{2-(2-methyl-5-nitro-1 <i>H</i> -imidazol-1-yl)ethyl}sulfonyl}piperazine (43)                    |
| 2-(2-Methyl-5-nitro-1 <i>H</i> -imidazol-1-yl)- <i>N</i> -[3-(4-morpholinyl)propyl]ethanesulfonamide (44)    |
| 2-(2-Methyl-5-nitro-1 <i>H</i> -imidazol-1-yl)- <i>N</i> -[2-(1-piperidinyl)ethyl]ethanesulfonamide (45)     |
| <i>N,N</i> -Dimethyl-1-{{2-(2-methyl-5-nitro-1 <i>H</i> -imidazol-1-yl)ethyl}sulfonyl}-4-piperidinamine (46) |

# Compound 13 1H

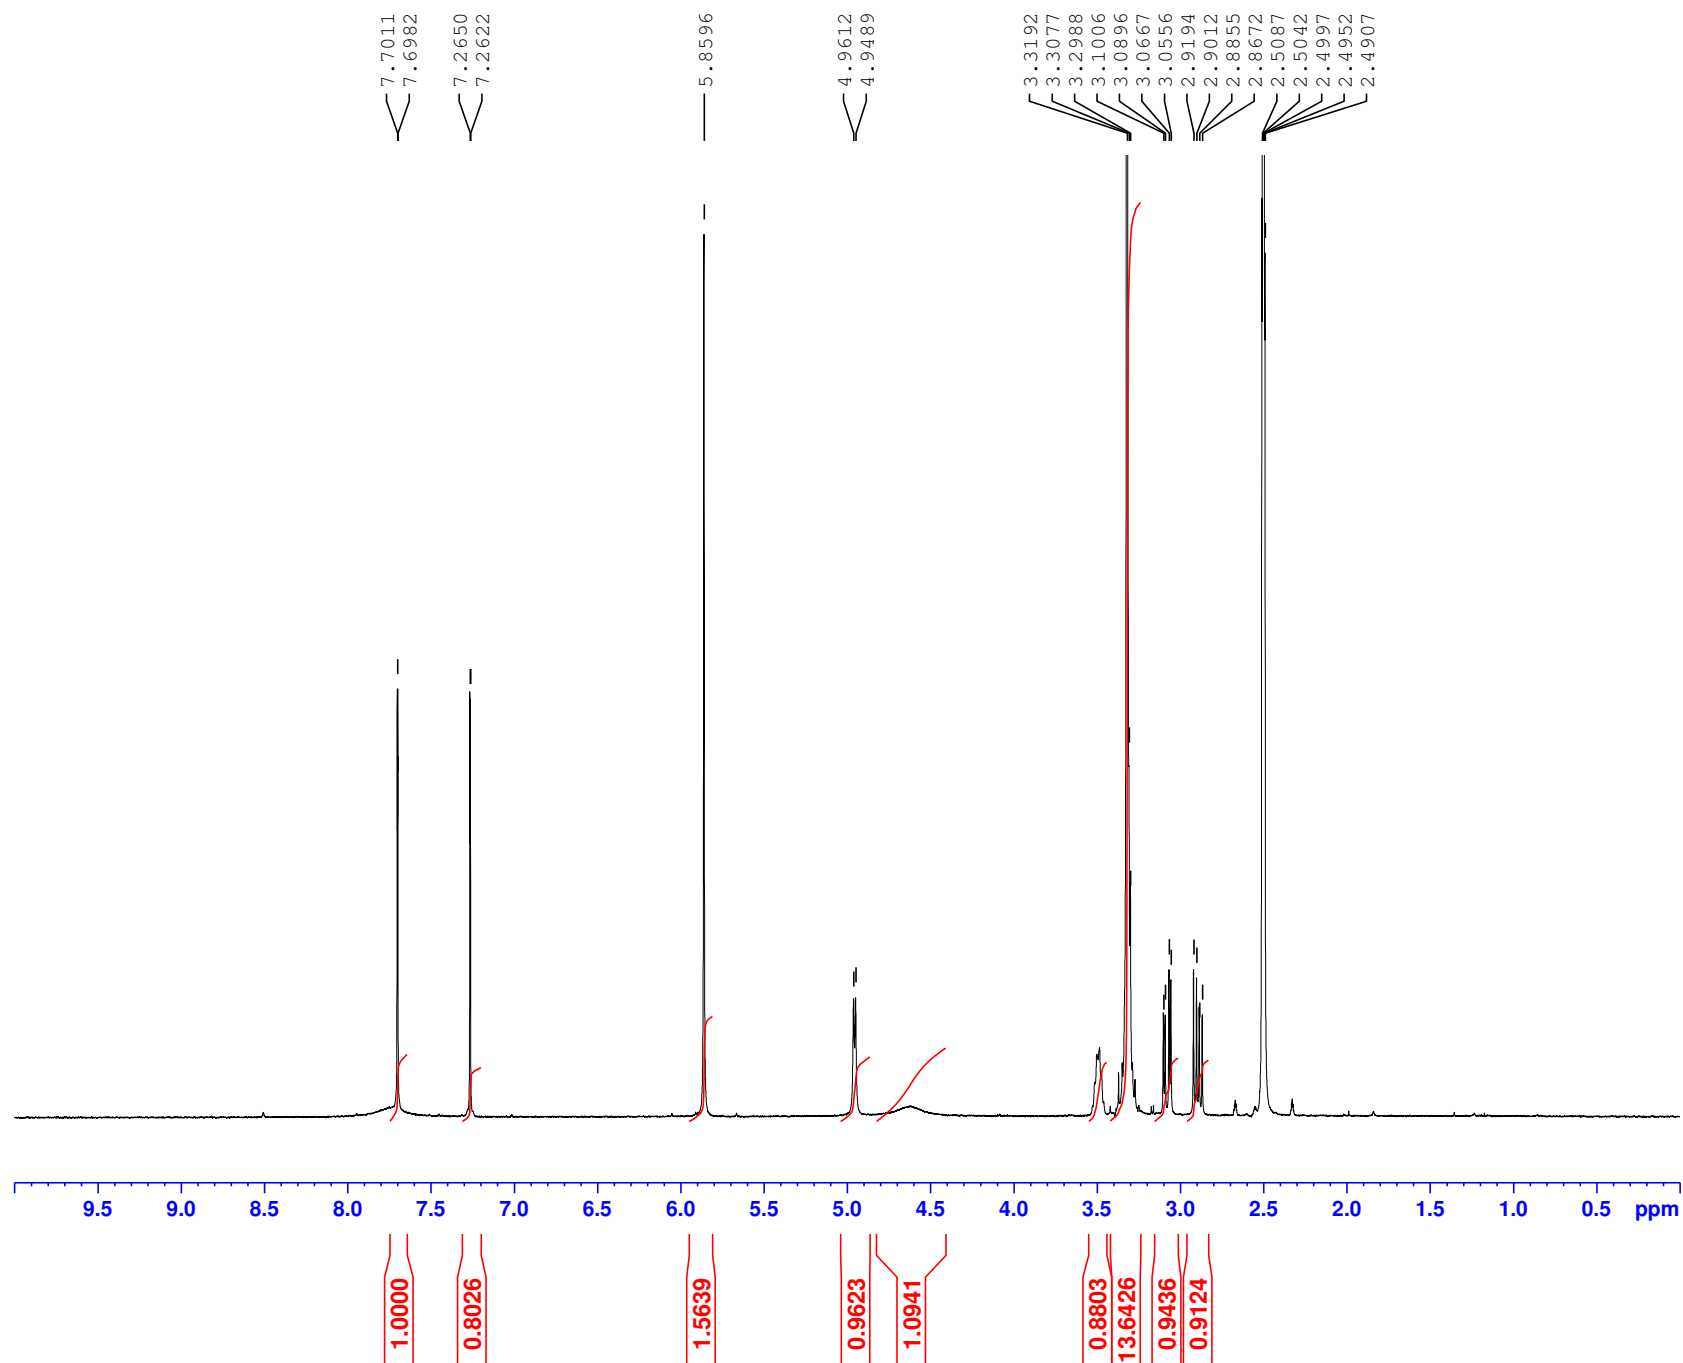

Current Data Parameters  
NAME Dec12-2017  
EXPNO 3  
PROCNO 1

F2 - Acquisition Parameters  
Date\_ 20171212  
Time 9.40 h  
INSTRUM spect  
PROBHD Z108618\_0860 (  
PULPROG zg30  
TD 65536  
SOLVENT DMSO  
NS 64  
DS 2  
SWH 8012.820 Hz  
FIDRES 0.244532 Hz  
AQ 4.0894465 sec  
RG 198.55  
DW 62.400 usec  
DE 6.50 usec  
TE 298.0 K  
D1 1.00000000 sec  
TD0 1  
SFO1 400.1324708 MHz  
NUC1 1H  
P1 13.60 usec  
PLW1 13.19999981 W

F2 - Processing parameters  
SI 65536  
SF 400.1300027 MHz  
WDW EM  
SSB 0  
LB 0.30 Hz  
GB 0  
PC 1.00

# Compound 13 13C

Current Data Parameters  
 NAME Jul29-2014-FMHSacsronmr  
 EXPNO 25  
 PROCNO 1

F2 - Acquisition Parameters  
 Date\_ 20140730  
 Time\_ 6.16 h  
 INSTRUM spect  
 PROBHD 5 mm BBO BB-1H  
 PULPROG zgpg50  
 TD 65536  
 SOLVENT DMSO  
 NS 24000  
 DS 4  
 SWH 26178.008 Hz  
 FIDRES 0.798889 Hz  
 AQ 1.2517377 sec  
 RG 11585.2  
 DW 19.100 usec  
 DE 10.00 usec  
 TE 298.0 K  
 D1 0.75000000 sec  
 d11 0.03000000 sec  
 DELTA 0.64999998 sec  
 TD0 1  
 SFO1 100.6248351 MHz  
 NUC1 13C  
 P1 11.80 usec  
 SFO2 400.1316677 MHz  
 NUC2 1H  
 CPDPRG[2] waltz16  
 PCPD2 100.00 usec

F2 - Processing parameters  
 SI 32768  
 SF 100.6128165 MHz  
 WDW EM  
 SSB 0  
 LB 1.00 Hz  
 GB 0  
 PC 1.40

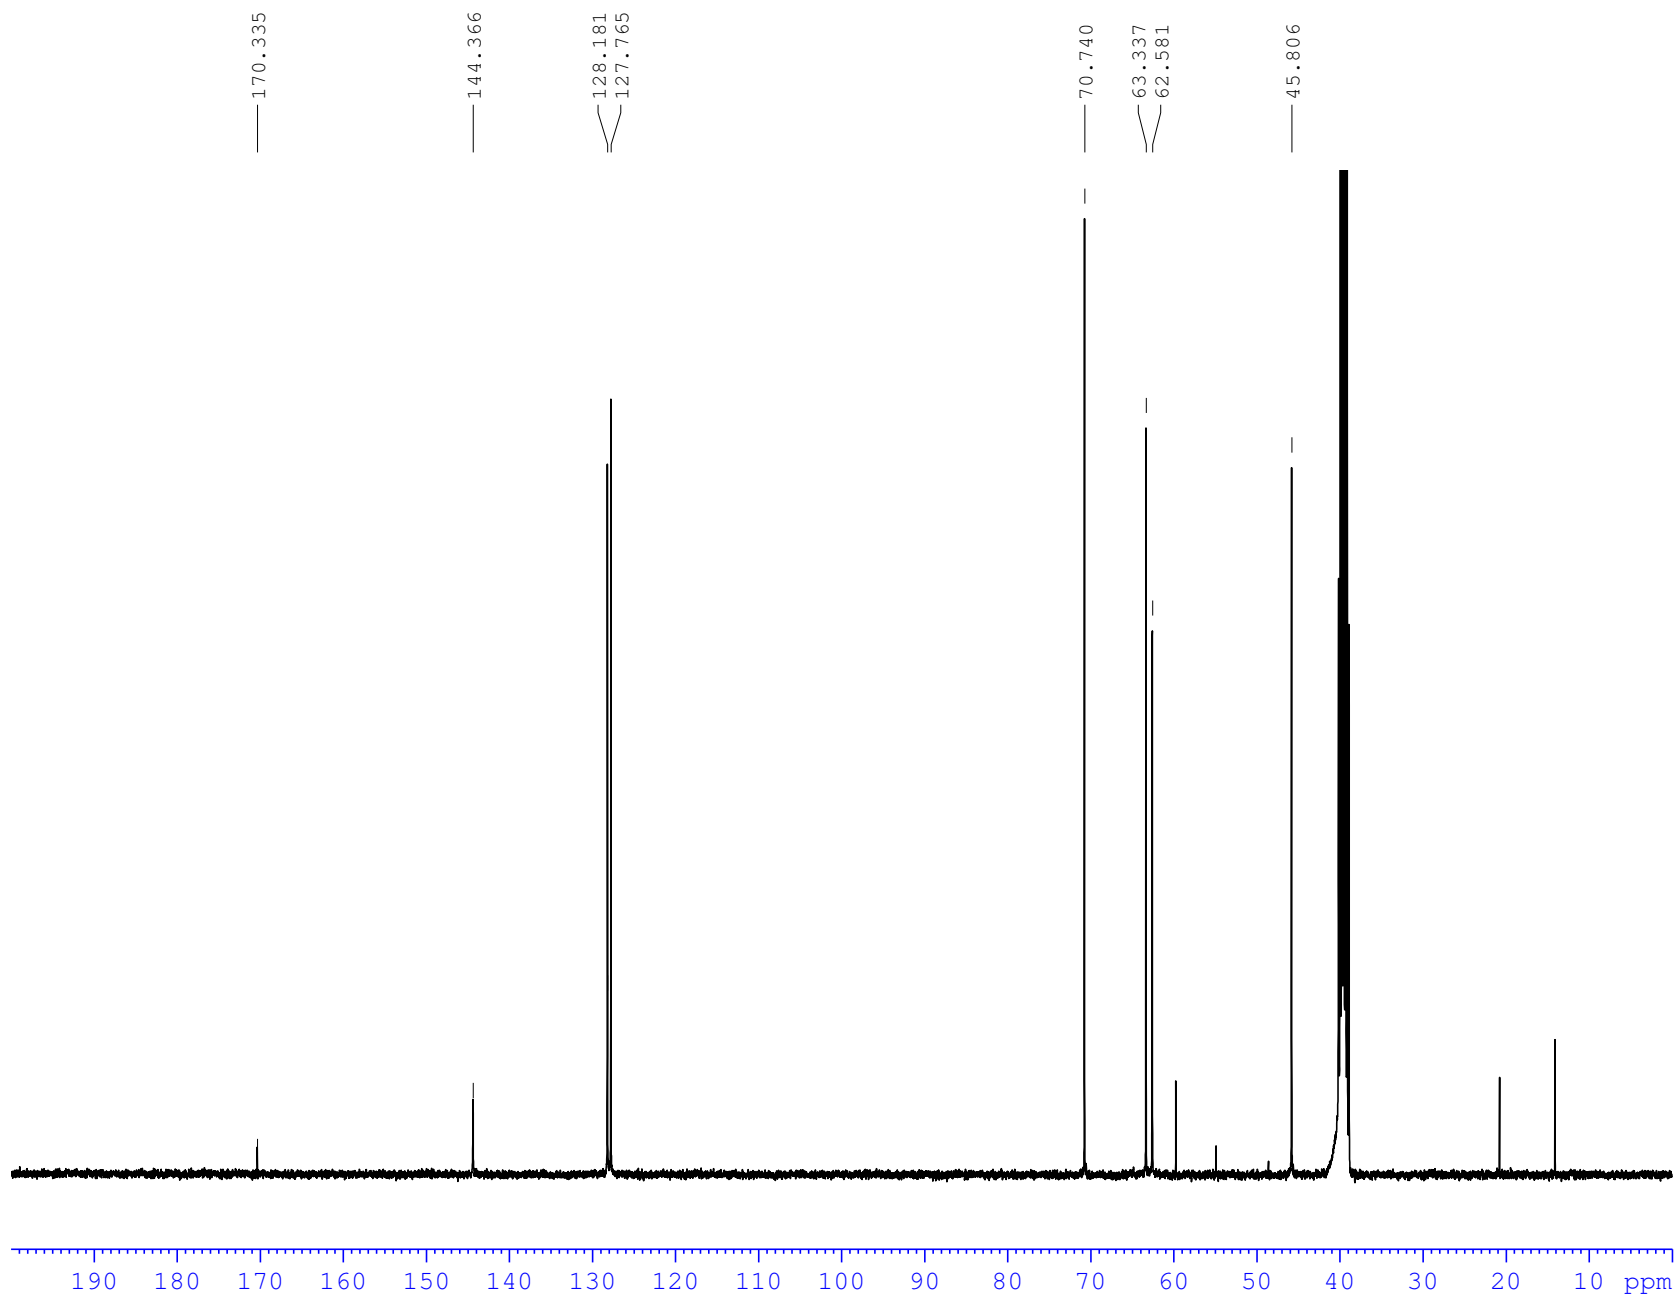

# Compound 13

mAU

DAD1 B, Sig=320,16 Ref=550,50 (SISIRAK2\SK-AUG-14 2014-08-21 12-56-33\CG0022873.D)

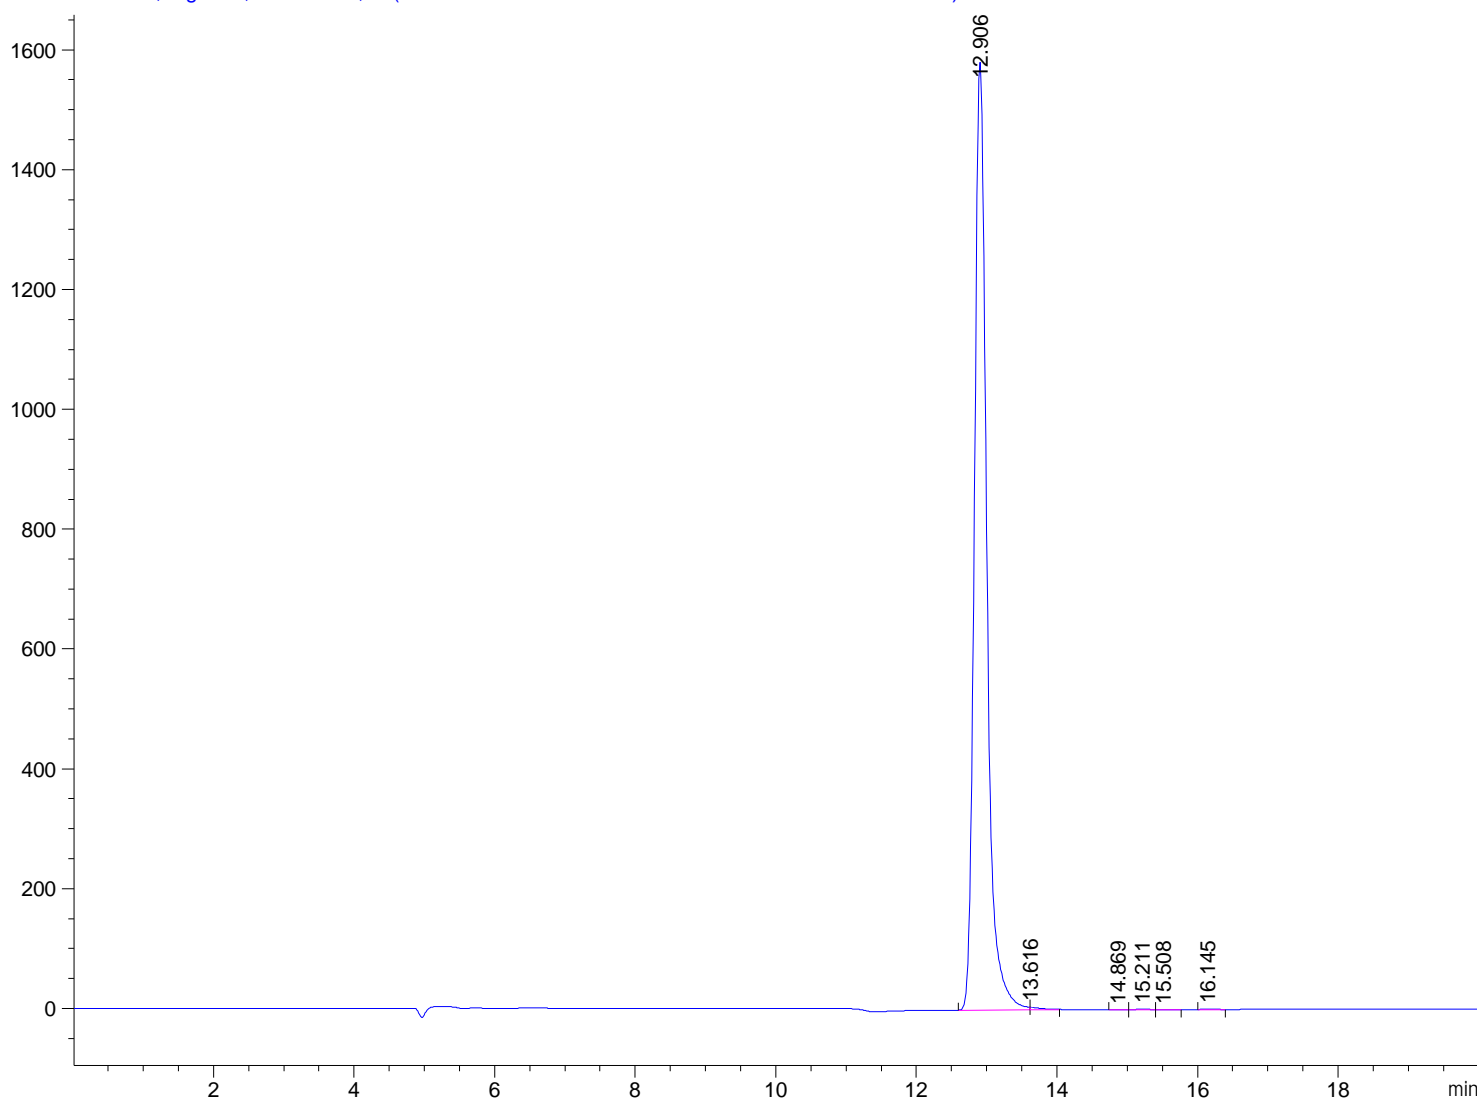

## Area Percent Report

Signal 1: DAD1 B, Sig=320,16 Ref=550,50

| Peak # | RetTime [min] | Type | Width [min] | Area [mAU*s] | Height [mAU] | Area %  |
|--------|---------------|------|-------------|--------------|--------------|---------|
| 1      | 12.906        | MF   | 0.2036      | 1.93487e4    | 1584.10071   | 99.5742 |
| 2      | 13.616        | FM   | 0.1802      | 47.05440     | 4.35176      | 0.2422  |
| 3      | 14.869        | MF   | 0.1476      | 3.03744      | 3.42872e-1   | 0.0156  |
| 4      | 15.211        | MF   | 0.1794      | 16.90825     | 1.57065      | 0.0870  |
| 5      | 15.508        | FM   | 0.2148      | 4.59533      | 3.56635e-1   | 0.0236  |
| 6      | 16.145        | MM   | 0.1998      | 11.15317     | 9.30451e-1   | 0.0574  |

# Compound 14 1H

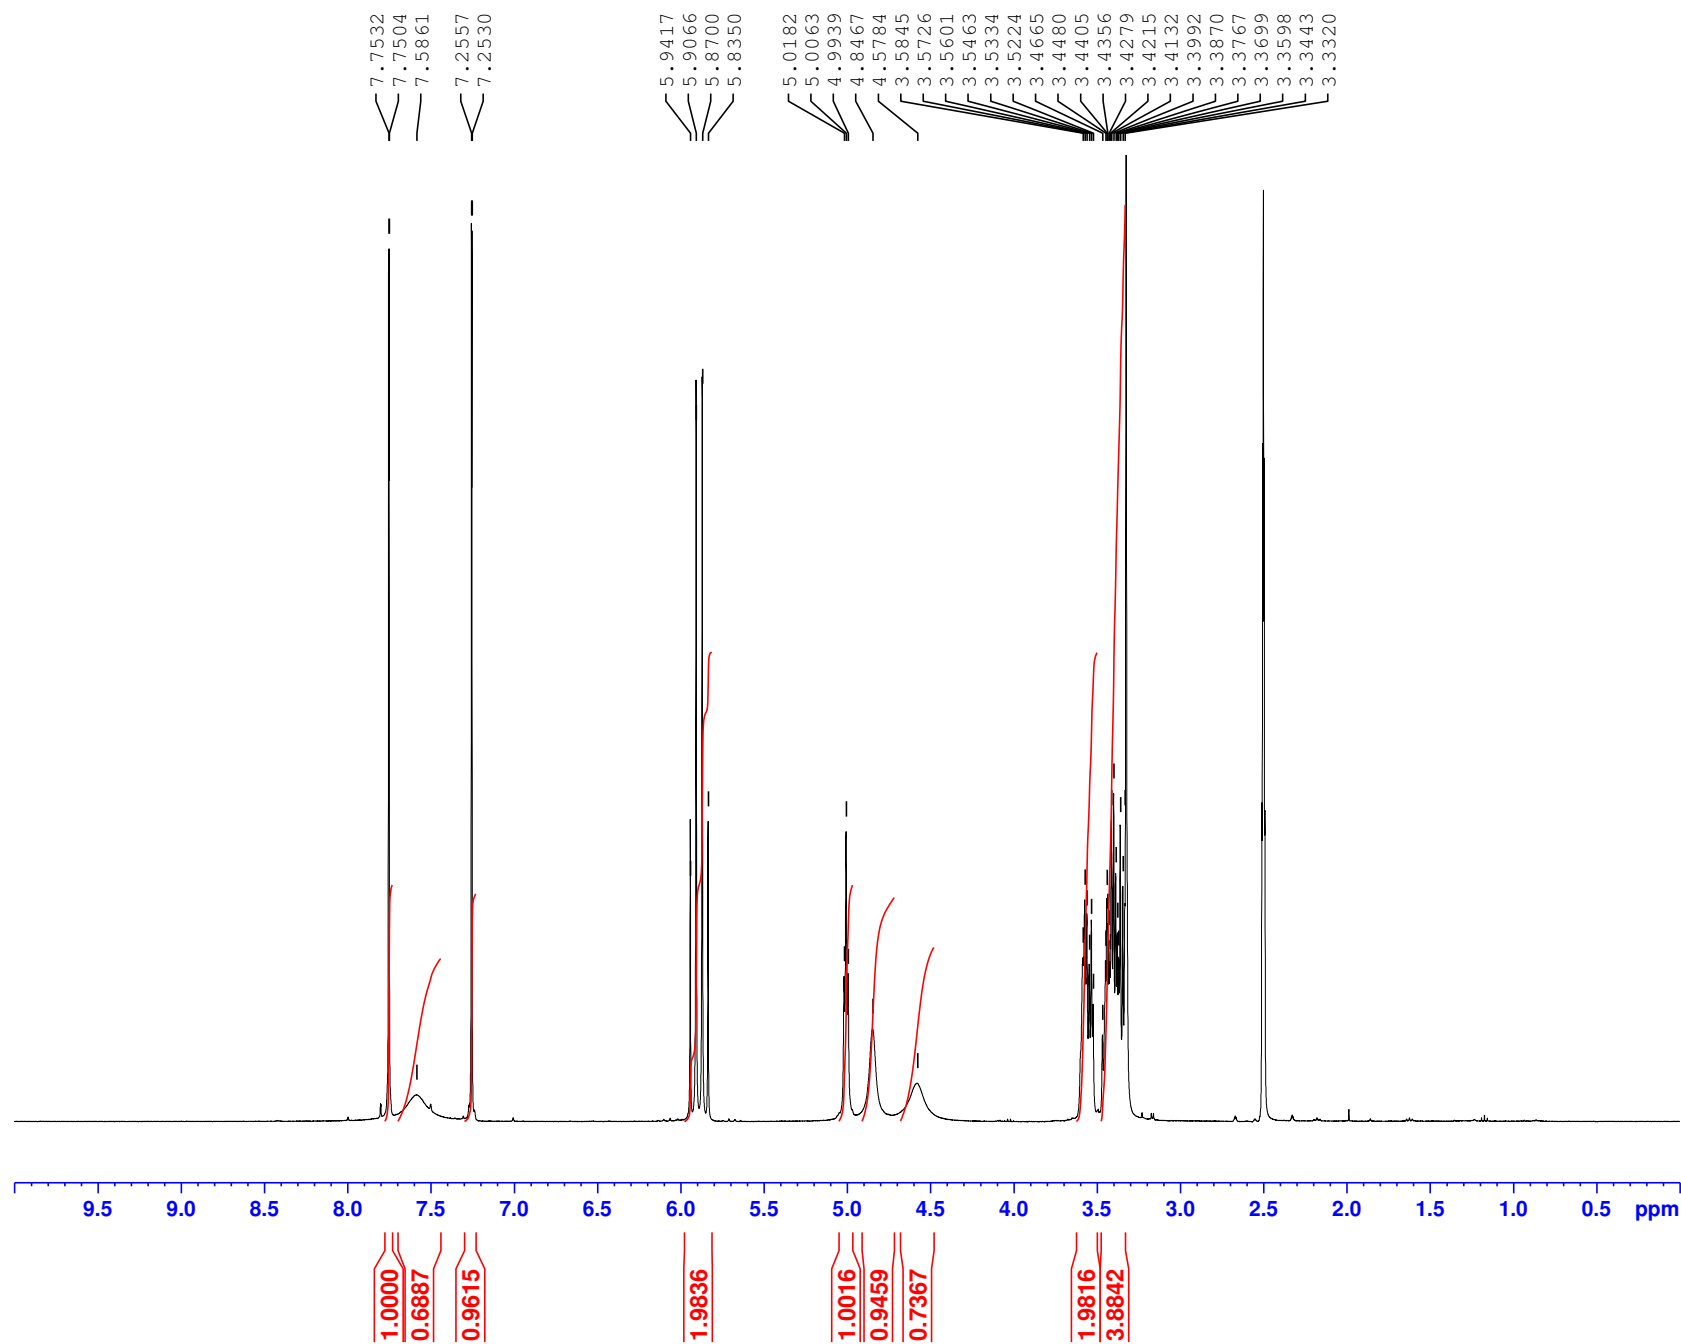

Current Data Parameters  
 NAME Jan24-2018  
 EXPNO 16  
 PROCNO 1

F2 - Acquisition Parameters  
 Date\_ 20180124  
 Time 16.47 h  
 INSTRUM spect  
 PROBHD Z108618\_0860 (  
 PULPROG zg30  
 TD 65536  
 SOLVENT DMSO  
 NS 64  
 DS 2  
 SWH 8012.820 Hz  
 FIDRES 0.244532 Hz  
 AQ 4.0894465 sec  
 RG 156.54  
 DW 62.400 usec  
 DE 6.50 usec  
 TE 298.0 K  
 D1 1.00000000 sec  
 TD0 1  
 SFO1 400.1324708 MHz  
 NUC1 1H  
 P1 13.60 usec  
 PLW1 13.19999981 W

F2 - Processing parameters  
 SI 65536  
 SF 400.1300027 MHz  
 WDW EM  
 SSB 0  
 LB 0.30 Hz  
 GB 0  
 PC 1.00

# Compound 14 13C

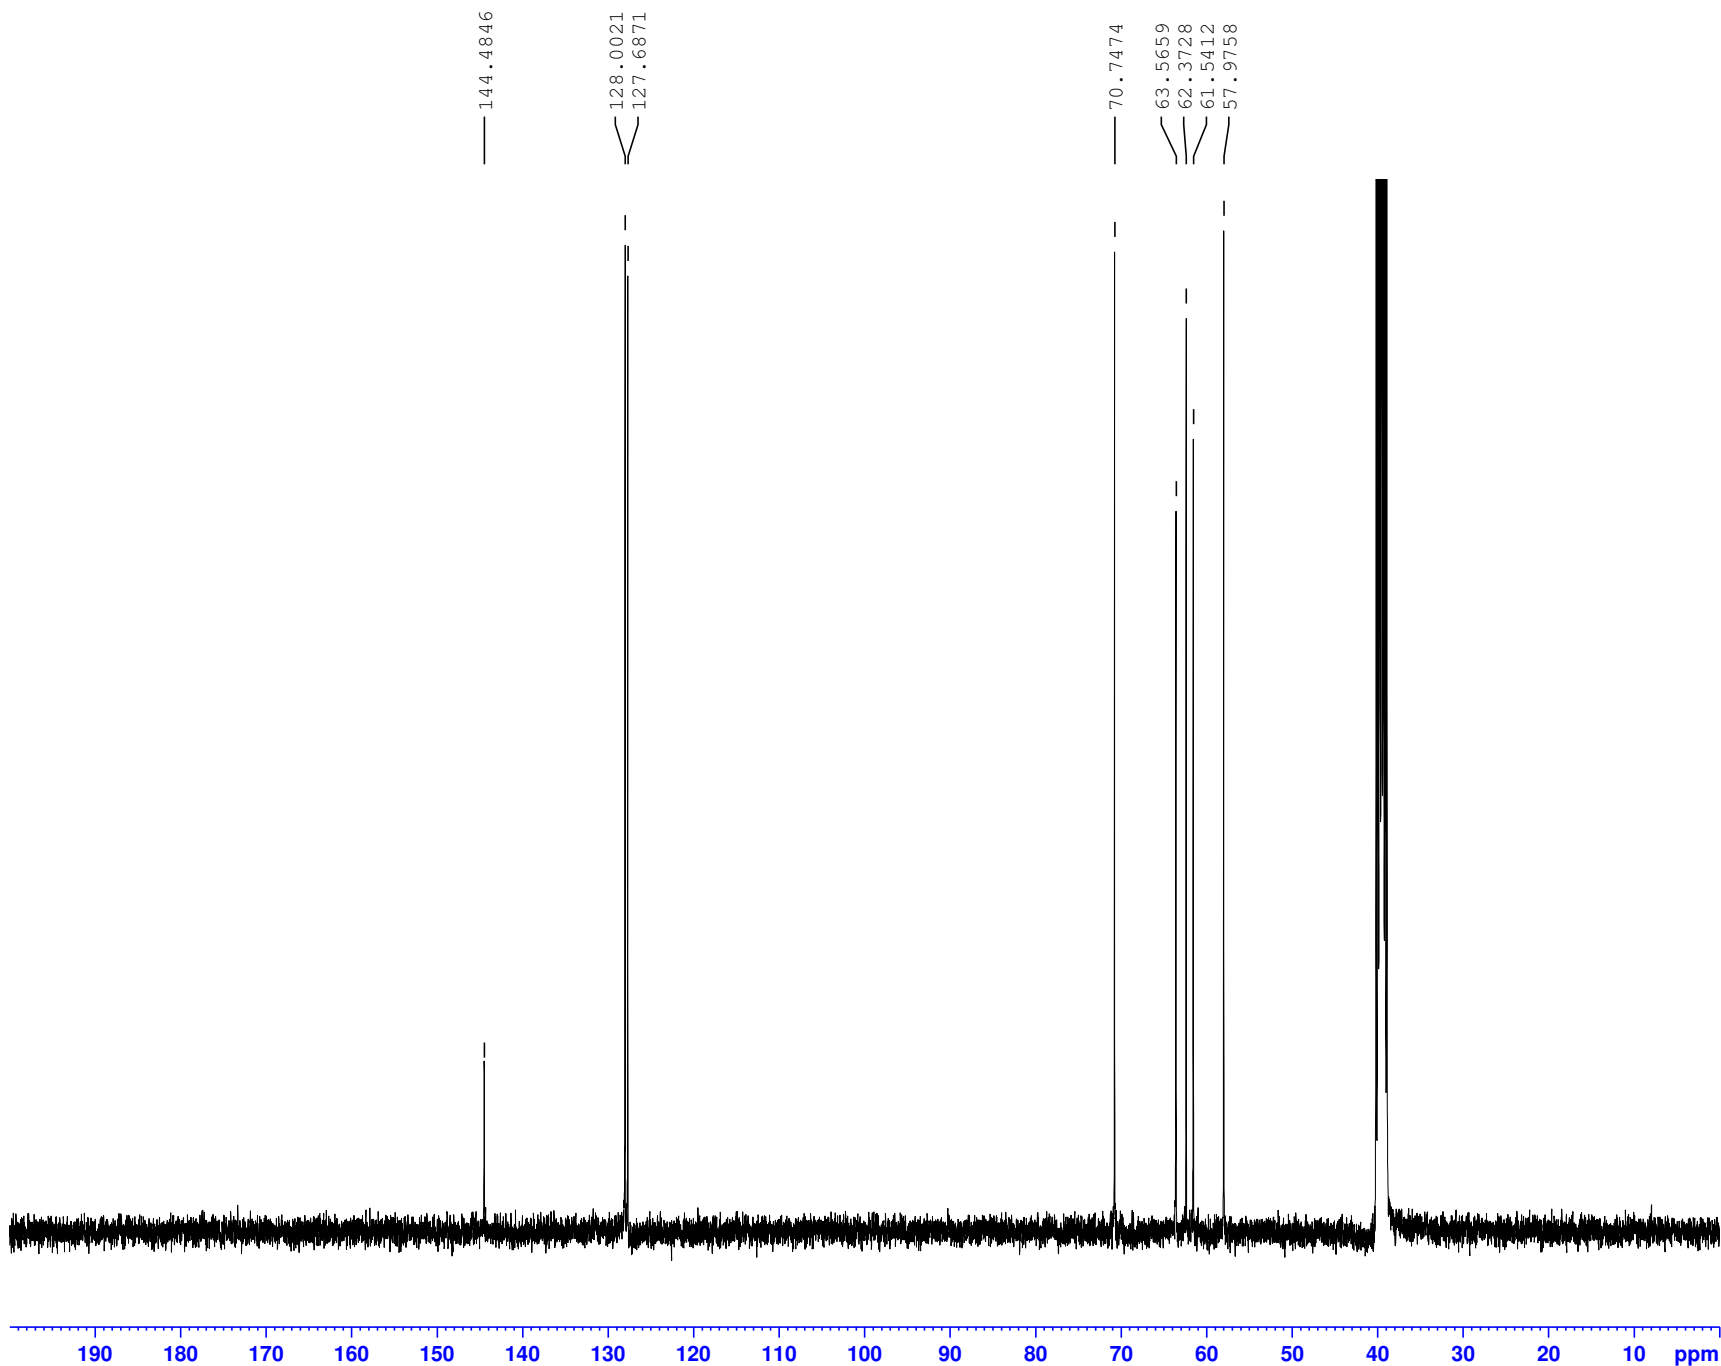

Current Data Parameters  
NAME Jan24-2018  
EXPNO 20  
PROCNO 1

F2 - Acquisition Parameters  
Date\_ 20180125  
Time\_ 0.52 h  
INSTRUM spect  
PROBHD Z108618\_0860 ( )  
PULPROG zgpg50  
TD 65536  
SOLVENT DMSO  
NS 6000  
DS 4  
SWH 24038.461 Hz  
FIDRES 0.733596 Hz  
AQ 1.3631488 sec  
RG 198.55  
DW 20.800 usec  
DE 6.50 usec  
TE 298.0 K  
D1 0.63999999 sec  
D11 0.03000000 sec  
TD0 1  
SFO1 100.6228298 MHz  
NUC1 13C  
P1 10.00 usec  
PLW1 48.17399979 W  
SFO2 400.1316005 MHz  
NUC2 1H  
CPDPRG[2] waltz16  
PCPD2 90.00 usec  
PLW2 13.19999981 W  
PLW12 0.30142000 W  
PLW13 0.15161000 W

F2 - Processing parameters  
SI 32768  
SF 100.6128156 MHz  
WDW EM  
SSB 0  
LB 1.00 Hz  
GB 0  
PC 1.40

# Compound 14

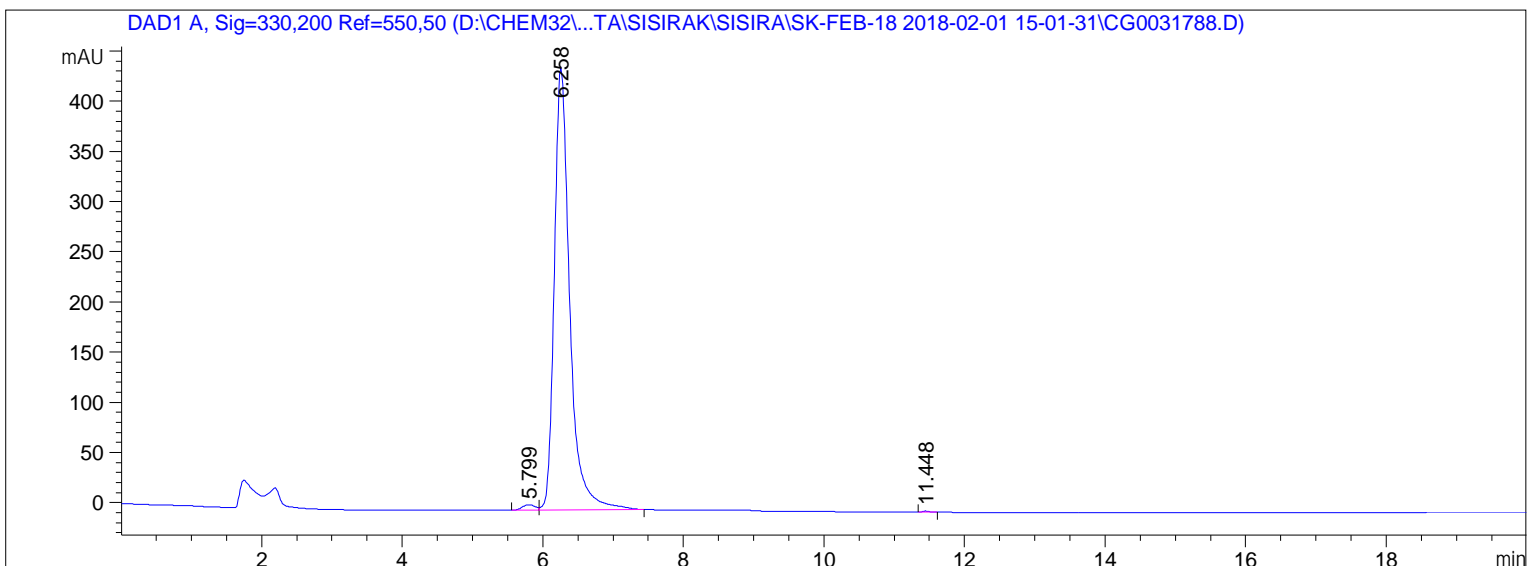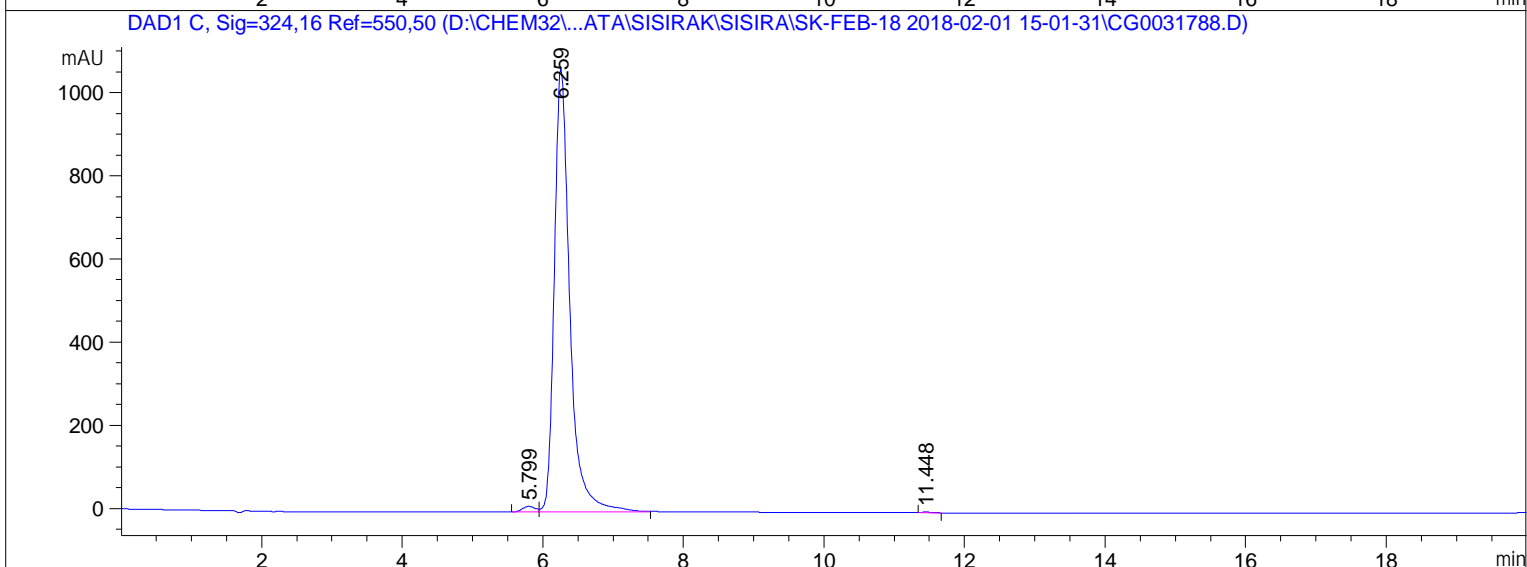

Signal 1: DAD1 A, Sig=330,200 Ref=550,50

| Peak # | RetTime [min] | Type | Width [min] | Area [mAU*s] | Height [mAU] | Area %  |
|--------|---------------|------|-------------|--------------|--------------|---------|
| 1      | 5.799         | BV   | 0.1955      | 68.46997     | 5.41624      | 1.0085  |
| 2      | 6.258         | VB   | 0.2300      | 6712.61426   | 440.04041    | 98.8701 |
| 3      | 11.448        | BB   | 0.1051      | 8.24262      | 1.18538      | 0.1214  |

Totals : 6789.32685 446.64203



# Compound 15 1H

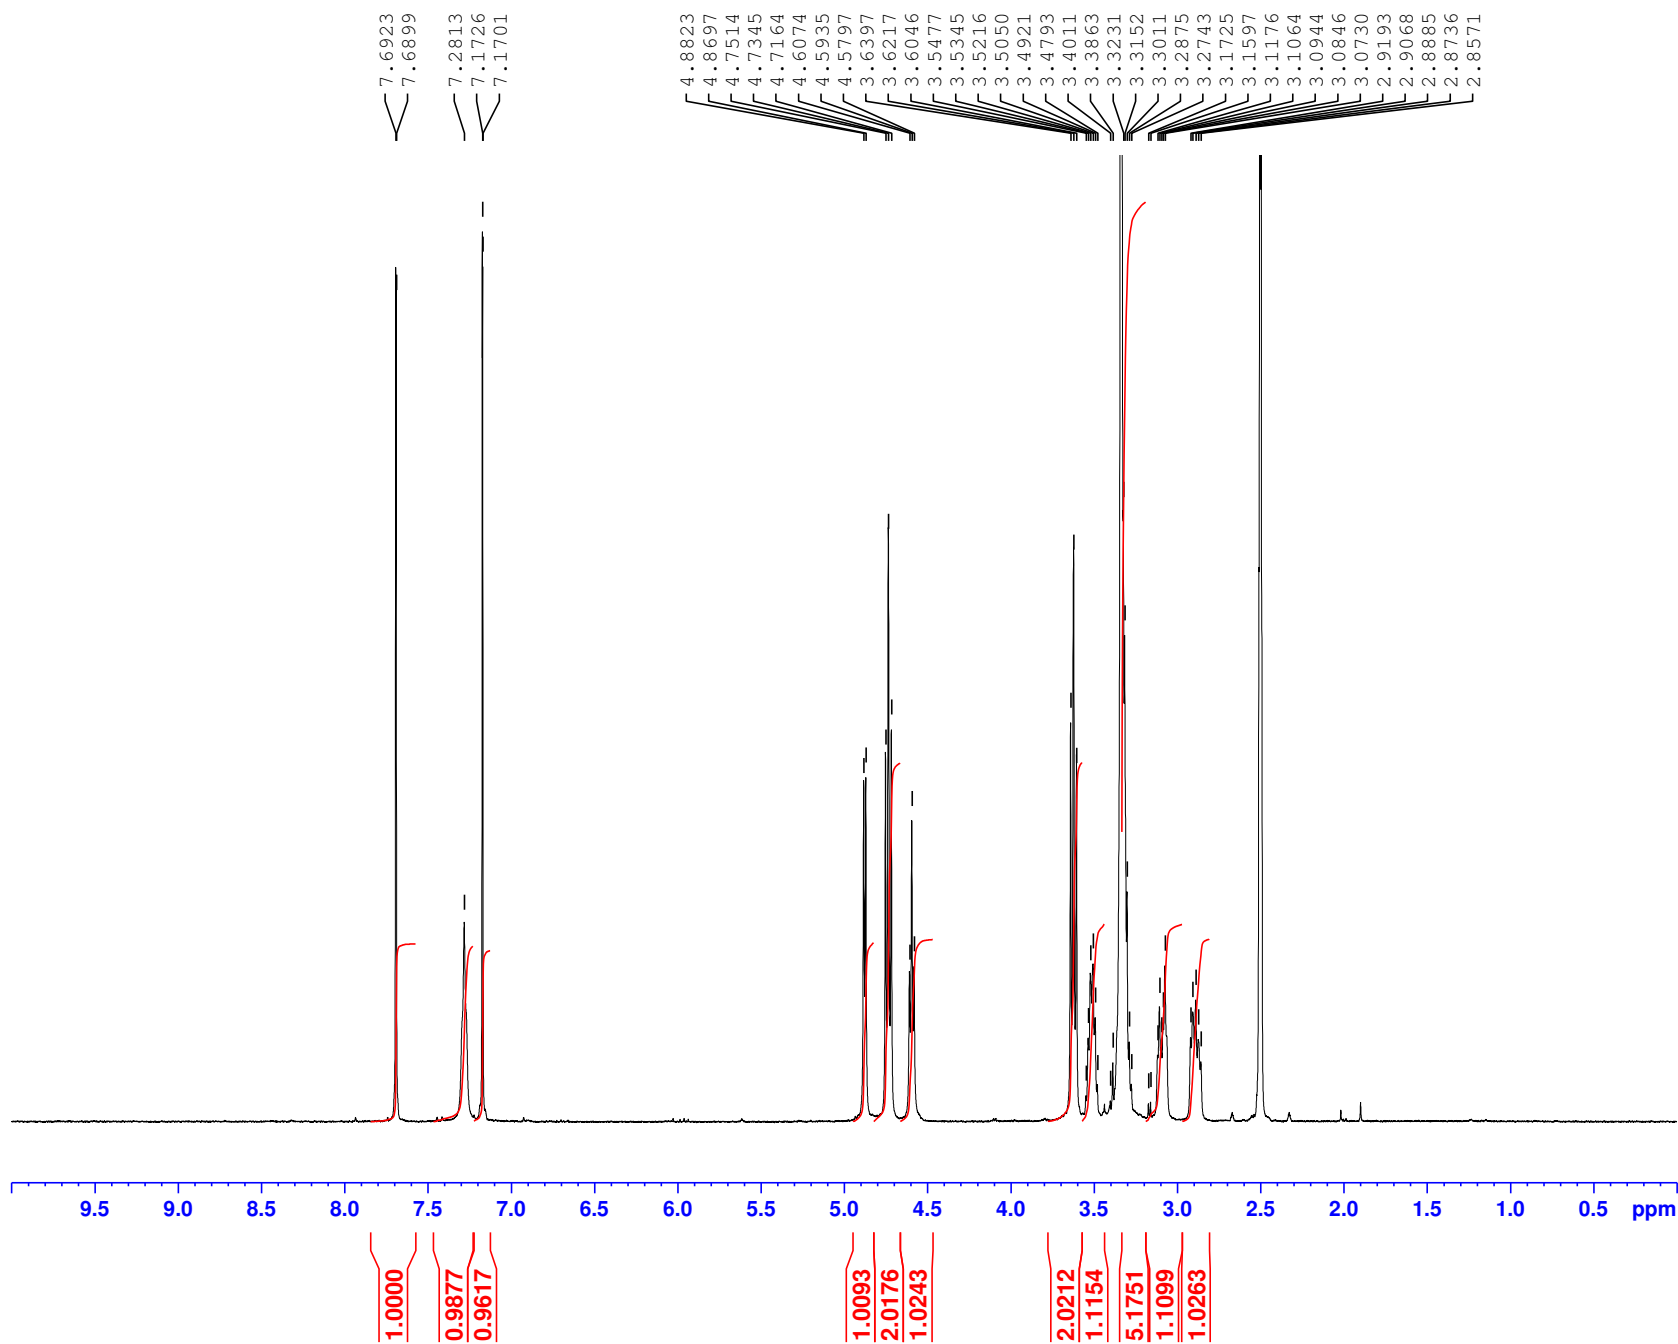

Current Data Parameters  
 NAME May05-2023  
 EXPNO 5  
 PROCNO 1

F2 - Acquisition Parameters  
 Date\_ 20230505  
 Time 15.08 h  
 INSTRUM spect  
 PROBHD Z108618\_0860 (  
 PULPROG zg30  
 TD 65536  
 SOLVENT DMSO  
 NS 12  
 DS 2  
 SWH 8012.820 Hz  
 FIDRES 0.244532 Hz  
 AQ 4.0894465 sec  
 RG 156.54  
 DW 62.400 usec  
 DE 6.50 usec  
 TE 298.0 K  
 D1 1.00000000 sec  
 TD0 1  
 SFO1 400.1324708 MHz  
 NUC1 1H  
 P0 4.53 usec  
 P1 13.60 usec  
 PLW1 13.19999981 W

F2 - Processing parameters  
 SI 65536  
 SF 400.1300025 MHz  
 WDW EM  
 SSB 0  
 LB 0.30 Hz  
 GB 0  
 PC 1.00

# Compound 15 13C

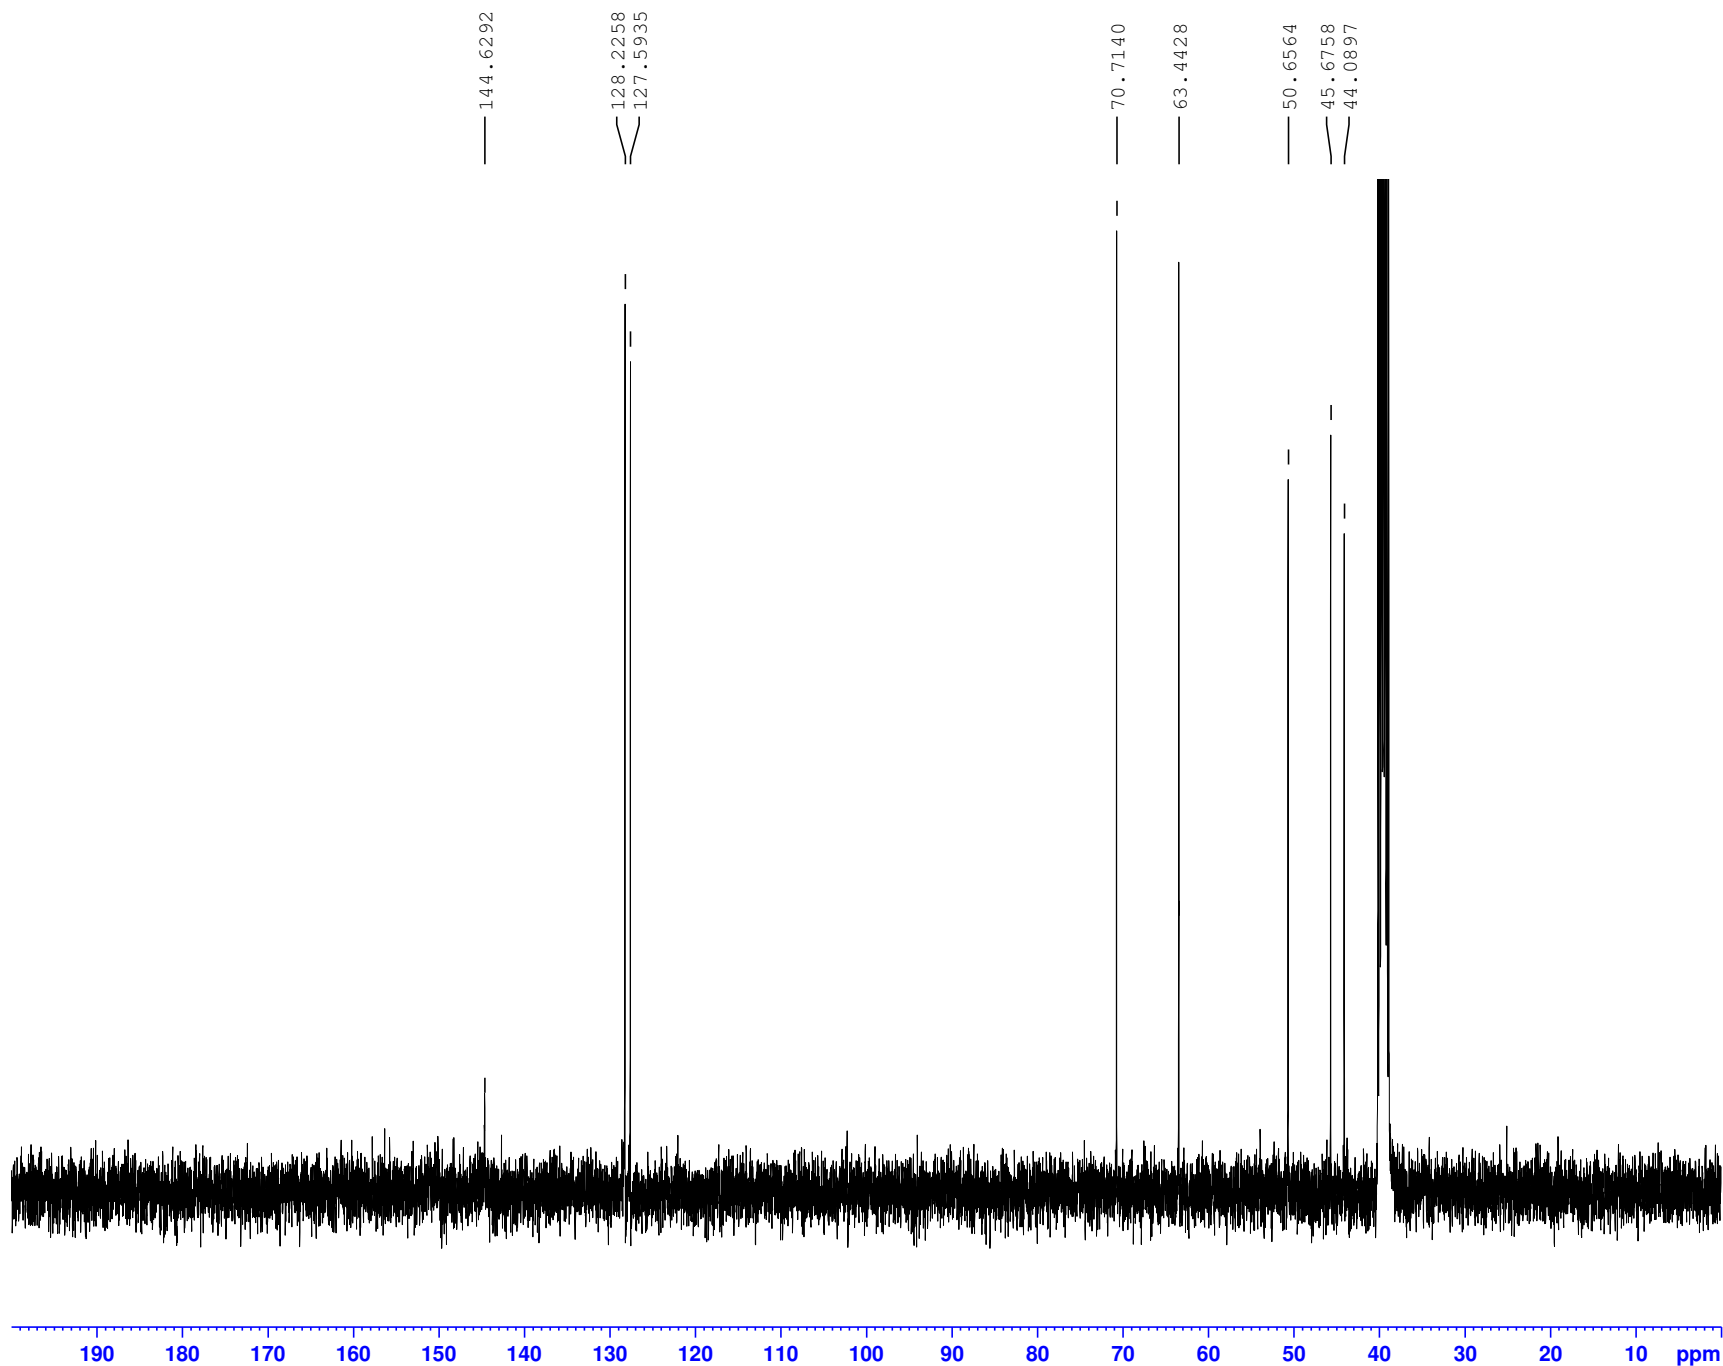

Current Data Parameters  
NAME May05-2023  
EXPNO 6  
PROCNO 1

F2 - Acquisition Parameters  
Date\_ 20230505  
Time 15.41 h  
INSTRUM spect  
PROBHD Z108618\_0860  
PULPROG zgpg50  
TD 65536  
SOLVENT DMSO  
NS 917  
DS 4  
SWH 24038.461 Hz  
FIDRES 0.733596 Hz  
AQ 1.3631488 sec  
RG 198.55  
DW 20.800 usec  
DE 6.50 usec  
TE 298.0 K  
D1 0.63999999 sec  
D11 0.03000000 sec  
TD0 1  
SF01 100.6228298 MHz  
NUC1 13C  
P1 10.00 usec  
PLW1 48.17399979 W  
SF02 400.1316005 MHz  
NUC2 1H  
CPDPRG[2] waltz16  
PCPD2 90.00 usec  
PLW2 13.19999981 W  
PLW12 0.30142000 W  
PLW13 0.15161000 W

F2 - Processing parameters  
SI 32768  
SF 100.6128156 MHz  
WDW EM  
SSB 0  
LB 1.00 Hz  
GB 0  
PC 1.40

# Compound 15

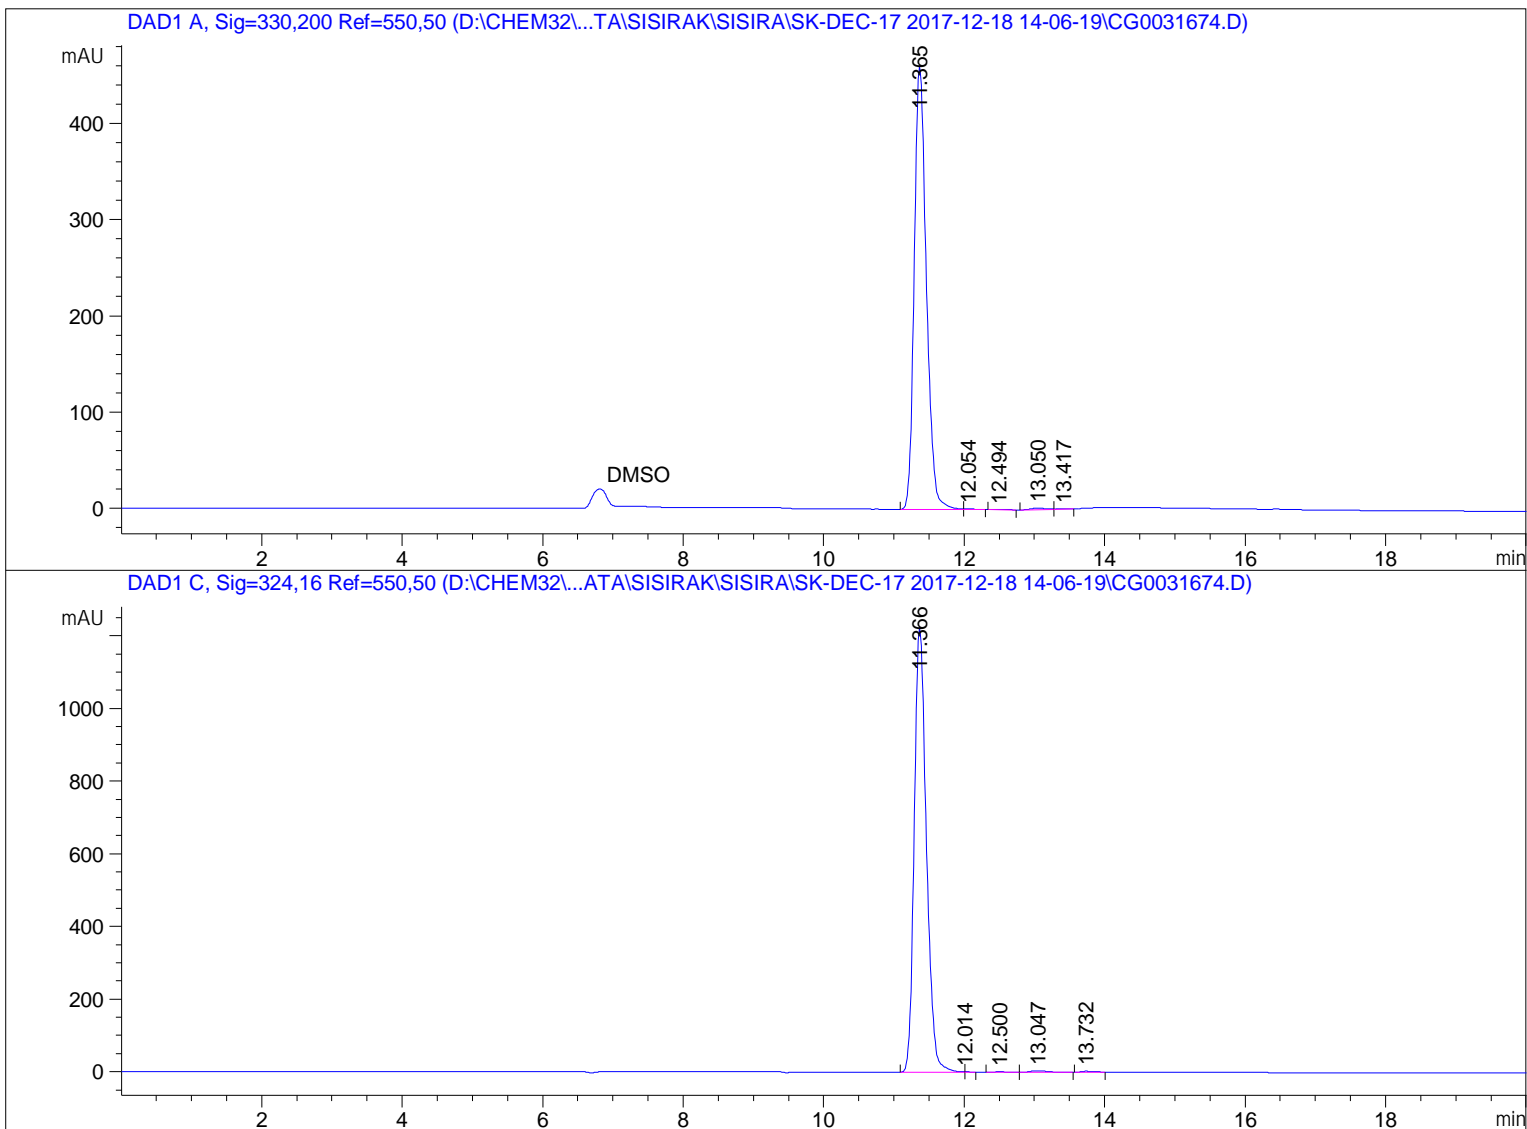

Signal 1: DAD1 A, Sig=330,200 Ref=550,50

| Peak # | RetTime [min] | Type | Width [min] | Area [mAU*s] | Height [mAU] | Area %  |
|--------|---------------|------|-------------|--------------|--------------|---------|
| 1      | 11.365        | MF   | 0.1991      | 5511.03223   | 461.43466    | 99.2574 |
| 2      | 12.054        | FM   | 0.1702      | 7.18620      | 7.03511e-1   | 0.1294  |
| 3      | 12.494        | MM   | 0.1868      | 5.84591      | 5.21696e-1   | 0.1053  |
| 4      | 13.050        | MF   | 0.2527      | 24.20798     | 1.59655      | 0.4360  |
| 5      | 13.417        | FM   | 0.2131      | 3.98964      | 3.12028e-1   | 0.0719  |

Totals : 5552.26196 464.56844

# Compound 16 1H

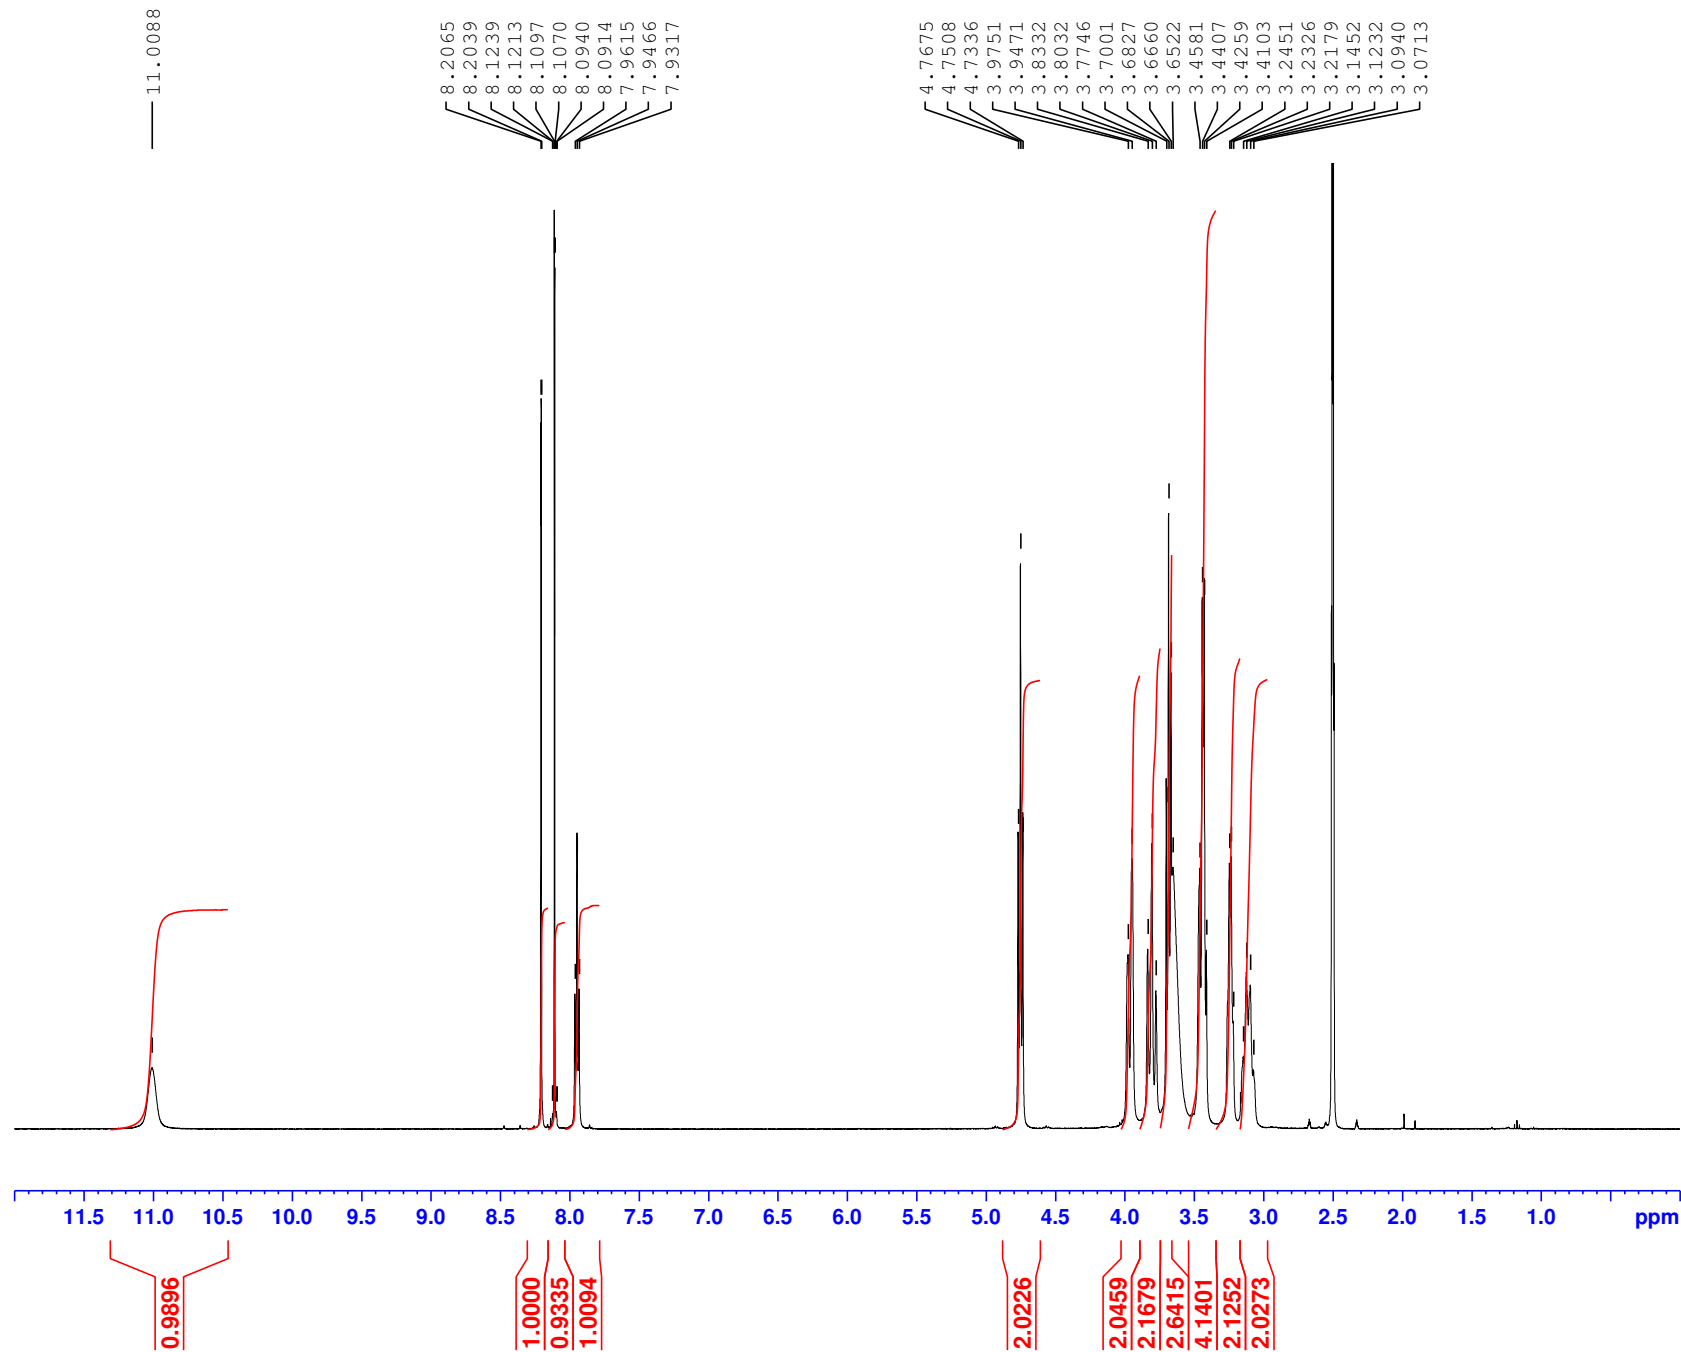

Current Data Parameters  
 NAME Nov17-2017  
 EXPNO 21  
 PROCNO 1

F2 - Acquisition Parameters  
 Date\_ 20171118  
 Time 16.46 h  
 INSTRUM spect  
 PROBHD Z108618\_0860 (  
 PULPROG zg30  
 TD 65536  
 SOLVENT DMSO  
 NS 64  
 DS 2  
 SWH 8012.820 Hz  
 FIDRES 0.244532 Hz  
 AQ 4.0894465 sec  
 RG 176.55  
 DW 62.400 usec  
 DE 6.50 usec  
 TE 298.0 K  
 D1 1.00000000 sec  
 TD0 1  
 SFO1 400.1324708 MHz  
 NUC1 1H  
 P1 13.60 usec  
 PLW1 13.19999981 W

F2 - Processing parameters  
 SI 65536  
 SF 400.1300026 MHz  
 WDW EM  
 SSB 0  
 LB 0.30 Hz  
 GB 0  
 PC 1.00

# Compound 16 13C

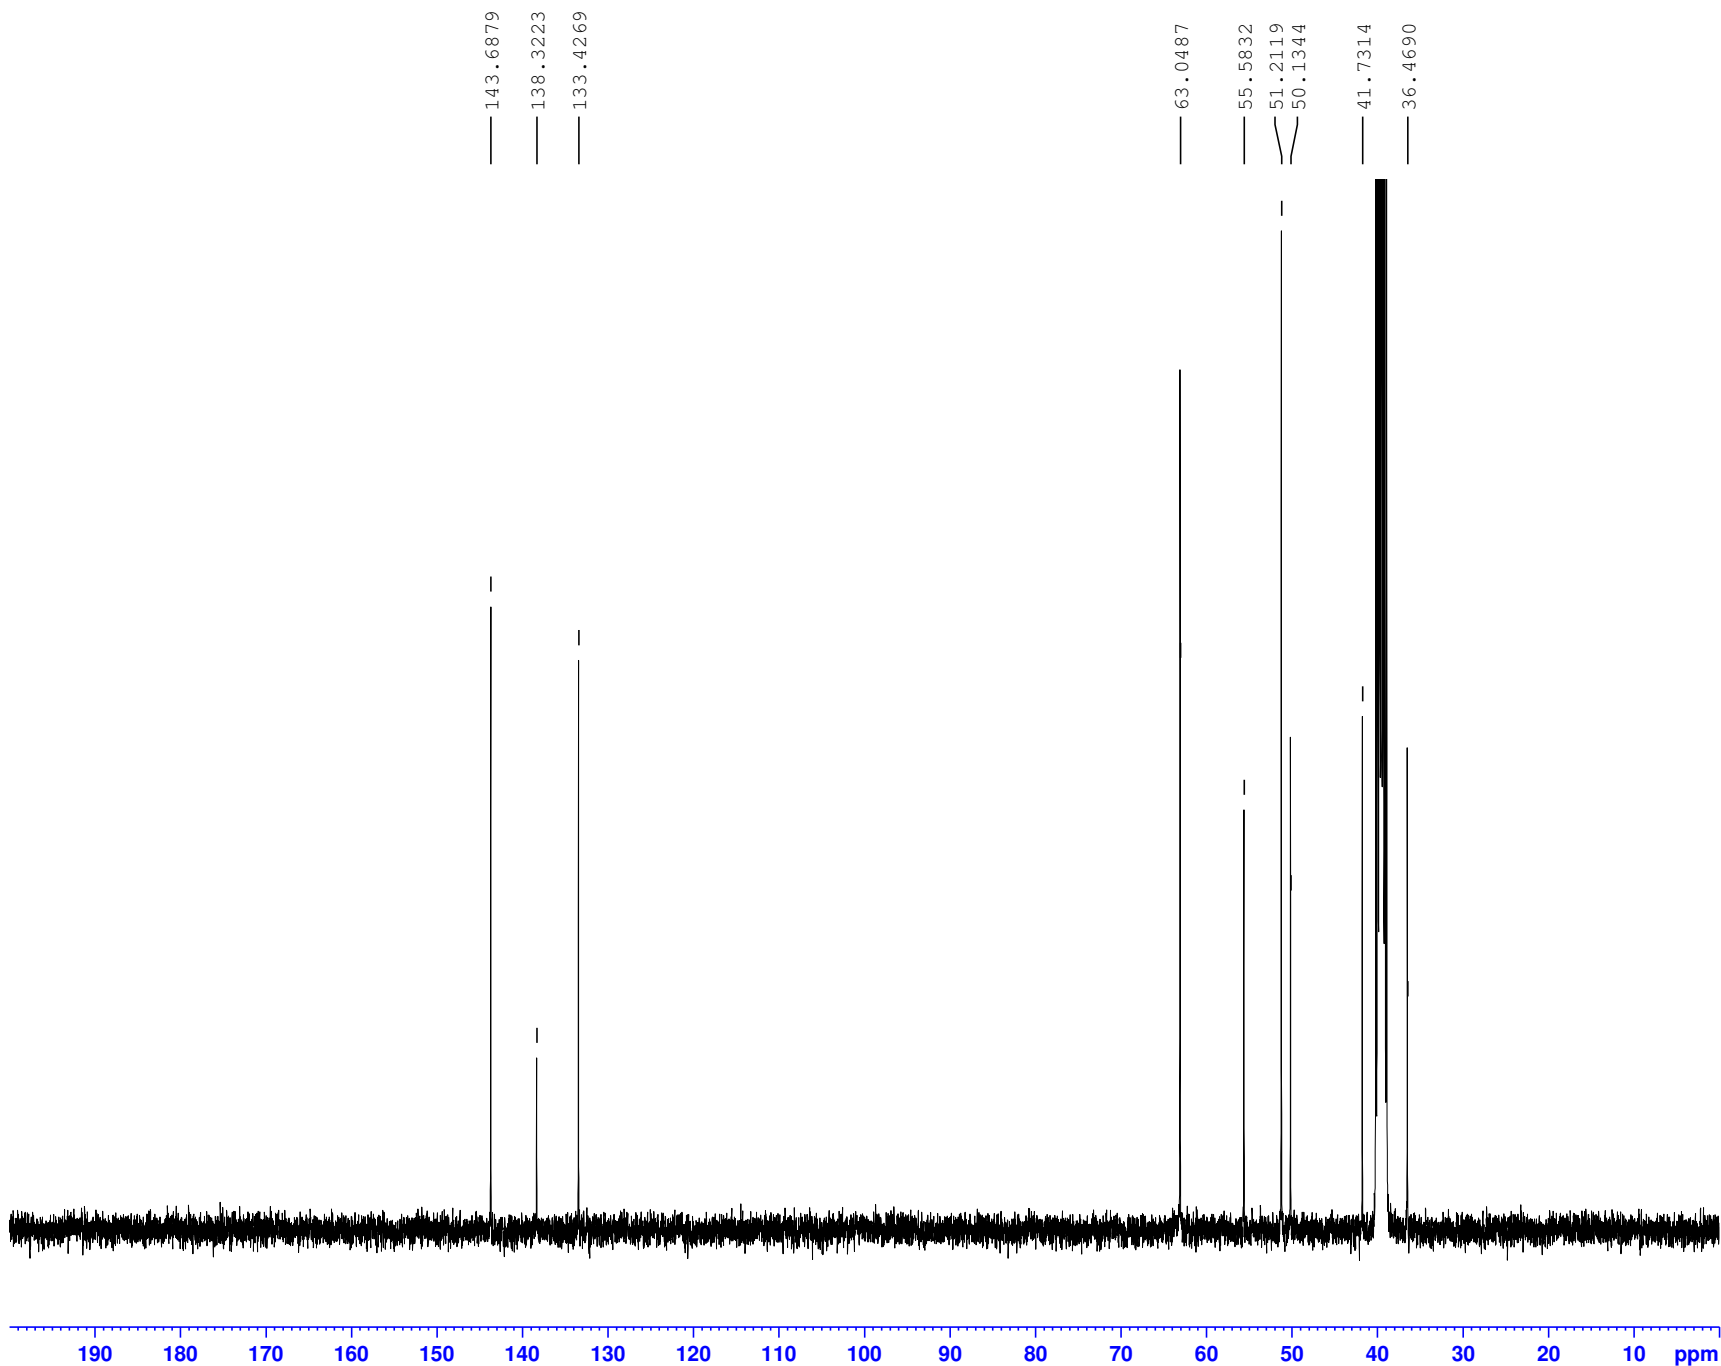

Current Data Parameters  
NAME Nov17-2017  
EXPNO 22  
PROCNO 1

F2 - Acquisition Parameters  
Date\_ 20171118  
Time 20.14 h  
INSTRUM spect  
PROBHD Z108618\_0860  
PULPROG zgpg50  
TD 65536  
SOLVENT DMSO  
NS 6000  
DS 4  
SWH 24038.461 Hz  
FIDRES 0.733596 Hz  
AQ 1.3631488 sec  
RG 198.55  
DW 20.800 usec  
DE 6.50 usec  
TE 298.0 K  
D1 0.63999999 sec  
D11 0.03000000 sec  
TD0 1  
SF01 100.6228298 MHz  
NUC1 13C  
P1 10.00 usec  
PLW1 48.17399979 W  
SF02 400.1316005 MHz  
NUC2 1H  
CPDPRG[2] waltz16  
PCPD2 90.00 usec  
PLW2 13.19999981 W  
PLW12 0.30142000 W  
PLW13 0.15161000 W

F2 - Processing parameters  
SI 32768  
SF 100.6128175 MHz  
WDW EM  
SSB 0  
LB 1.00 Hz  
GB 0  
PC 1.40

# Compound 16

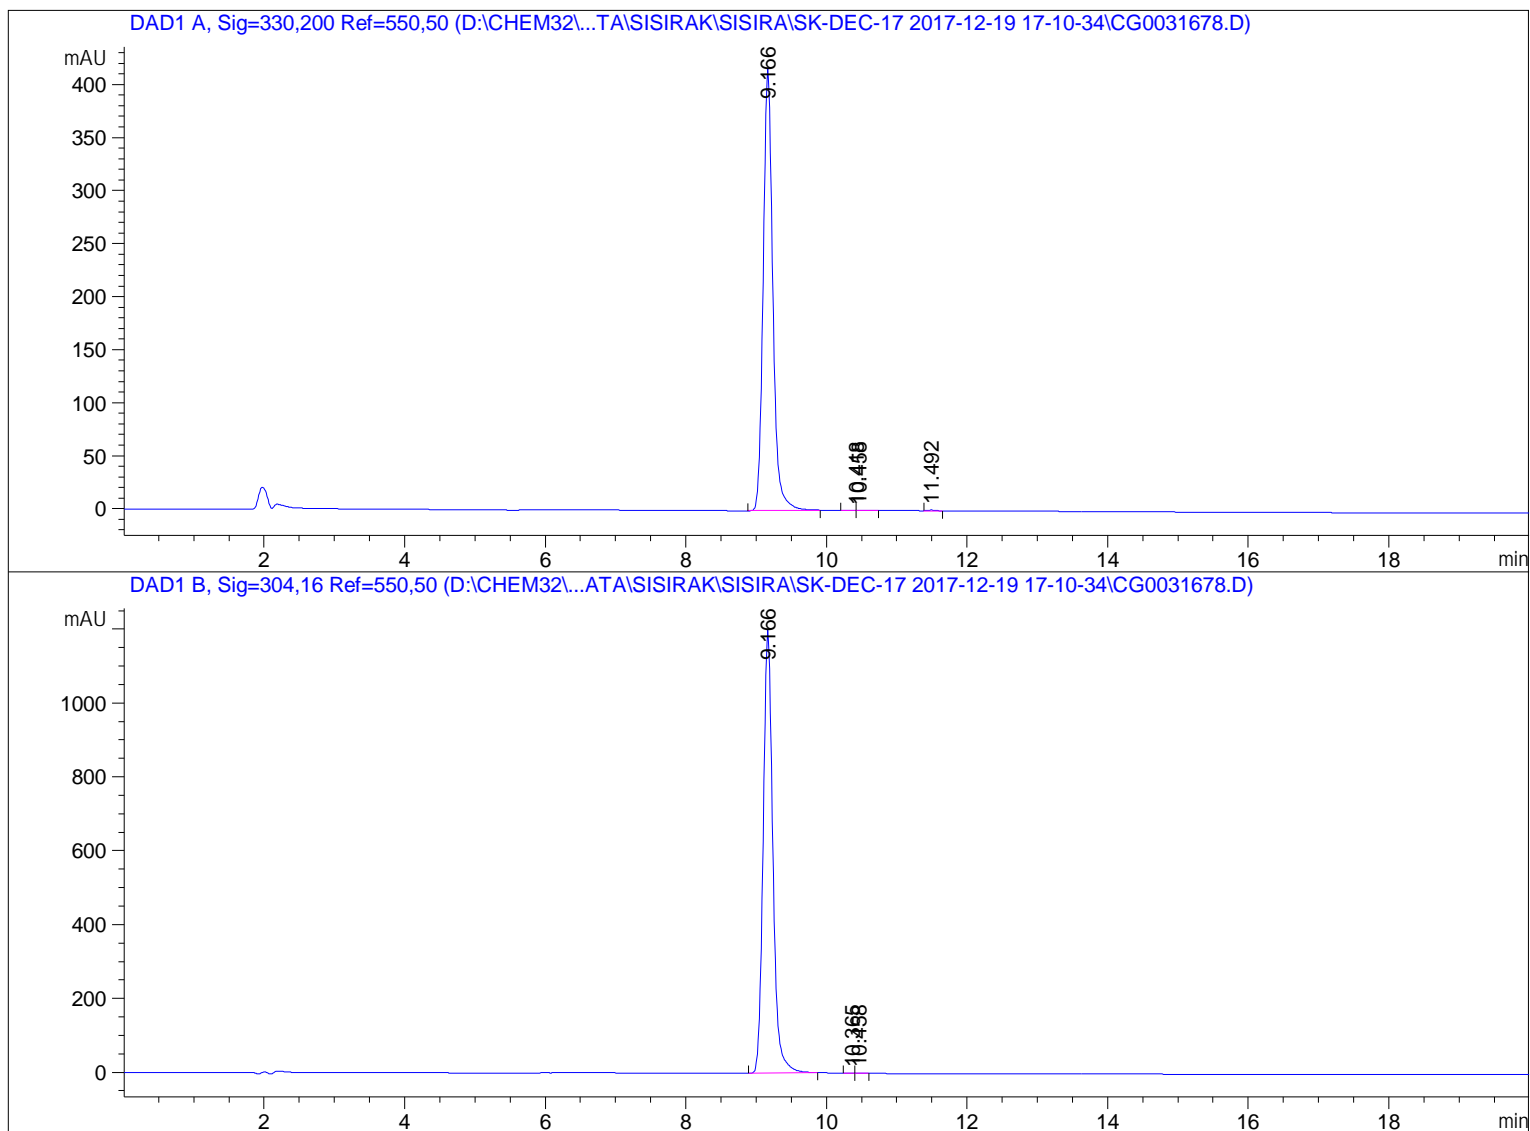

Signal 1: DAD1 A, Sig=330,200 Ref=550,50

Signal 1: DAD1 A, Sig=330,200 Ref=550,50

| Peak # | RetTime [min] | Type | Width [min] | Area [mAU*s] | Height [mAU] | Area %  |
|--------|---------------|------|-------------|--------------|--------------|---------|
| 1      | 9.166         | MM   | 0.1589      | 3980.00635   | 417.40576    | 99.8336 |
| 2      | 10.418        | MF   | 0.1356      | 1.04060      | 1.27894e-1   | 0.0261  |
| 3      | 10.458        | FM   | 0.1459      | 1.22499      | 1.39954e-1   | 0.0307  |
| 4      | 11.492        | MM   | 0.1126      | 4.36763      | 6.46343e-1   | 0.1096  |

Totals : 3986.63958 418.31995

# Compound 17 1H

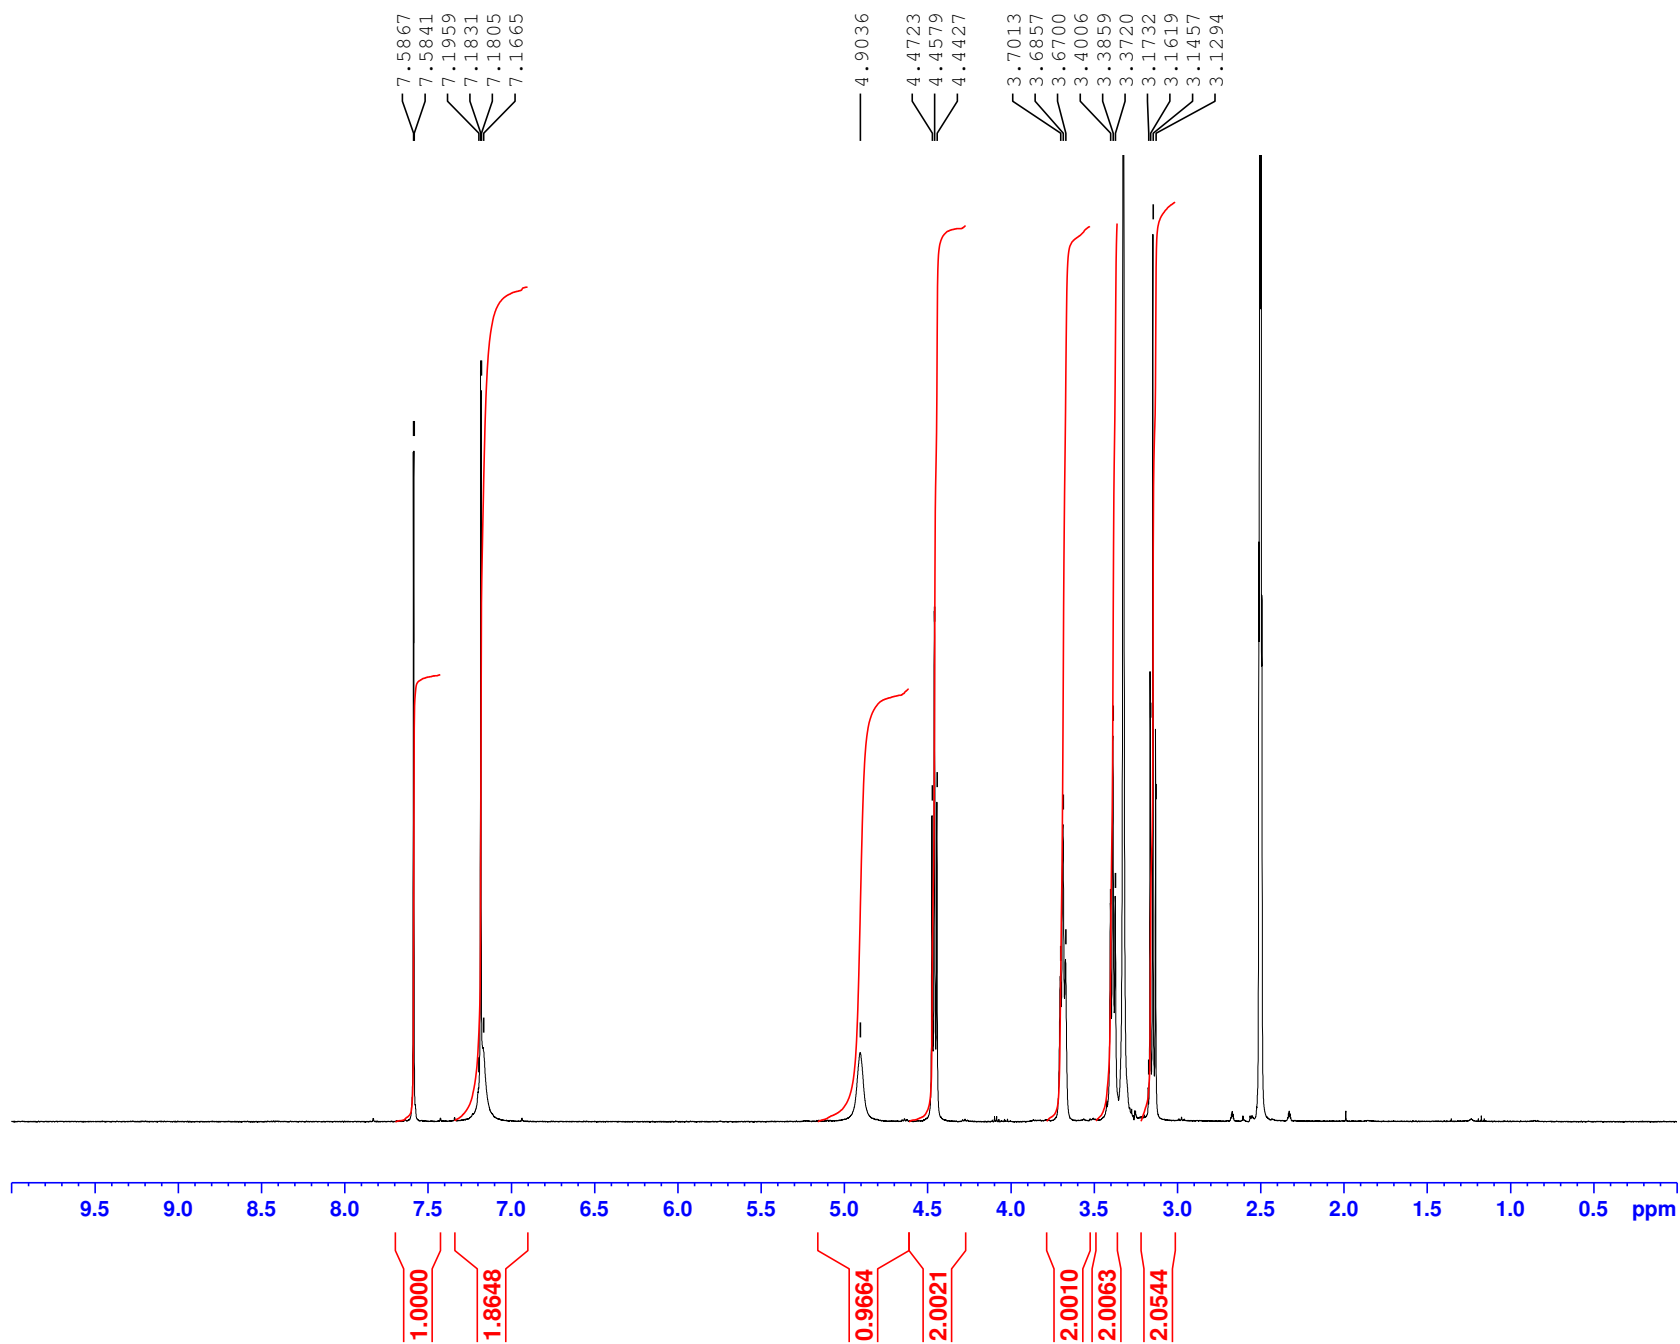

Current Data Parameters  
NAME Feb28-2018  
EXPNO 7  
PROCNO 1

F2 - Acquisition Parameters  
Date\_ 20180228  
Time 11.39 h  
INSTRUM spect  
PROBHD Z108618\_0860 (  
PULPROG zg30  
TD 65536  
SOLVENT DMSO  
NS 64  
DS 2  
SWH 8012.820 Hz  
FIDRES 0.244532 Hz  
AQ 4.0894465 sec  
RG 176.55  
DW 62.400 usec  
DE 6.50 usec  
TE 298.0 K  
D1 1.00000000 sec  
TD0 1  
SFO1 400.1324708 MHz  
NUC1 1H  
P1 13.60 usec  
PLW1 13.19999981 W

F2 - Processing parameters  
SI 65536  
SF 400.1300026 MHz  
WDW EM  
SSB 0  
LB 0.30 Hz  
GB 0  
PC 1.00

# Compound 17 13C

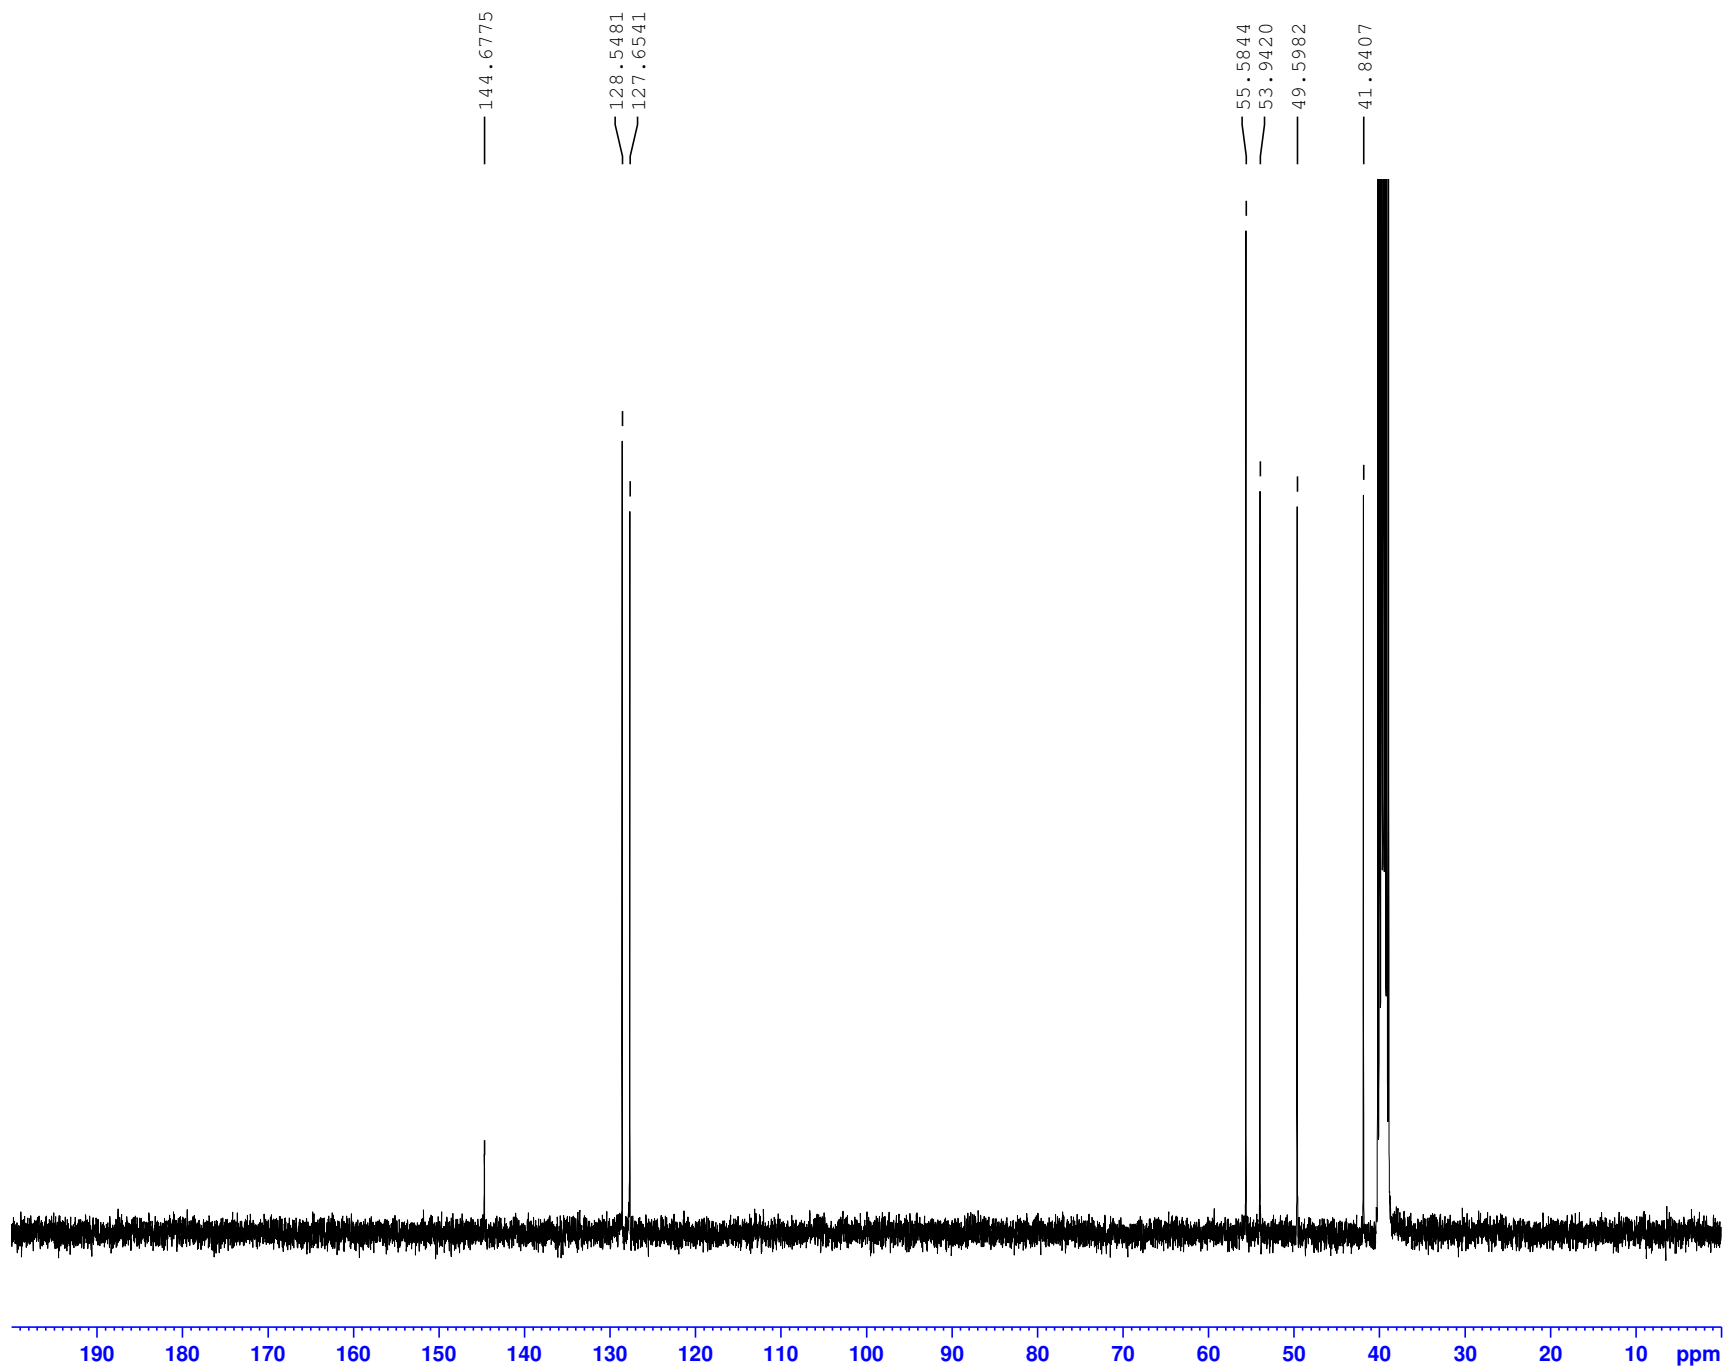

Current Data Parameters

|        |            |
|--------|------------|
| NAME   | Feb01-2018 |
| EXPNO  | 20         |
| PROCNO | 1          |

F2 - Acquisition Parameters

|           |                 |
|-----------|-----------------|
| Date_     | 20180201        |
| Time      | 18.47 h         |
| INSTRUM   | spect           |
| PROBHD    | Z108618_0860    |
| PULPROG   | zgpg50          |
| TD        | 65536           |
| SOLVENT   | DMSO            |
| NS        | 4000            |
| DS        | 4               |
| SWH       | 24038.461 Hz    |
| FIDRES    | 0.733596 Hz     |
| AQ        | 1.3631488 sec   |
| RG        | 198.55          |
| DW        | 20.800 usec     |
| DE        | 6.50 usec       |
| TE        | 298.0 K         |
| D1        | 0.63999999 sec  |
| D11       | 0.03000000 sec  |
| TD0       | 1               |
| SFO1      | 100.6228298 MHz |
| NUC1      | 13C             |
| P1        | 10.00 usec      |
| PLW1      | 48.17399979 W   |
| SFO2      | 400.1316005 MHz |
| NUC2      | 1H              |
| CPDPRG[2] | waltz16         |
| PCPD2     | 90.00 usec      |
| PLW2      | 13.19999981 W   |
| PLW12     | 0.30142000 W    |
| PLW13     | 0.15161000 W    |

F2 - Processing parameters

|     |                 |
|-----|-----------------|
| SI  | 32768           |
| SF  | 100.6128148 MHz |
| WDW | EM              |
| SSB | 0               |
| LB  | 1.00 Hz         |
| GB  | 0               |
| PC  | 1.40            |



# Compound 17

Additional Info : Peak(s) manually integrated

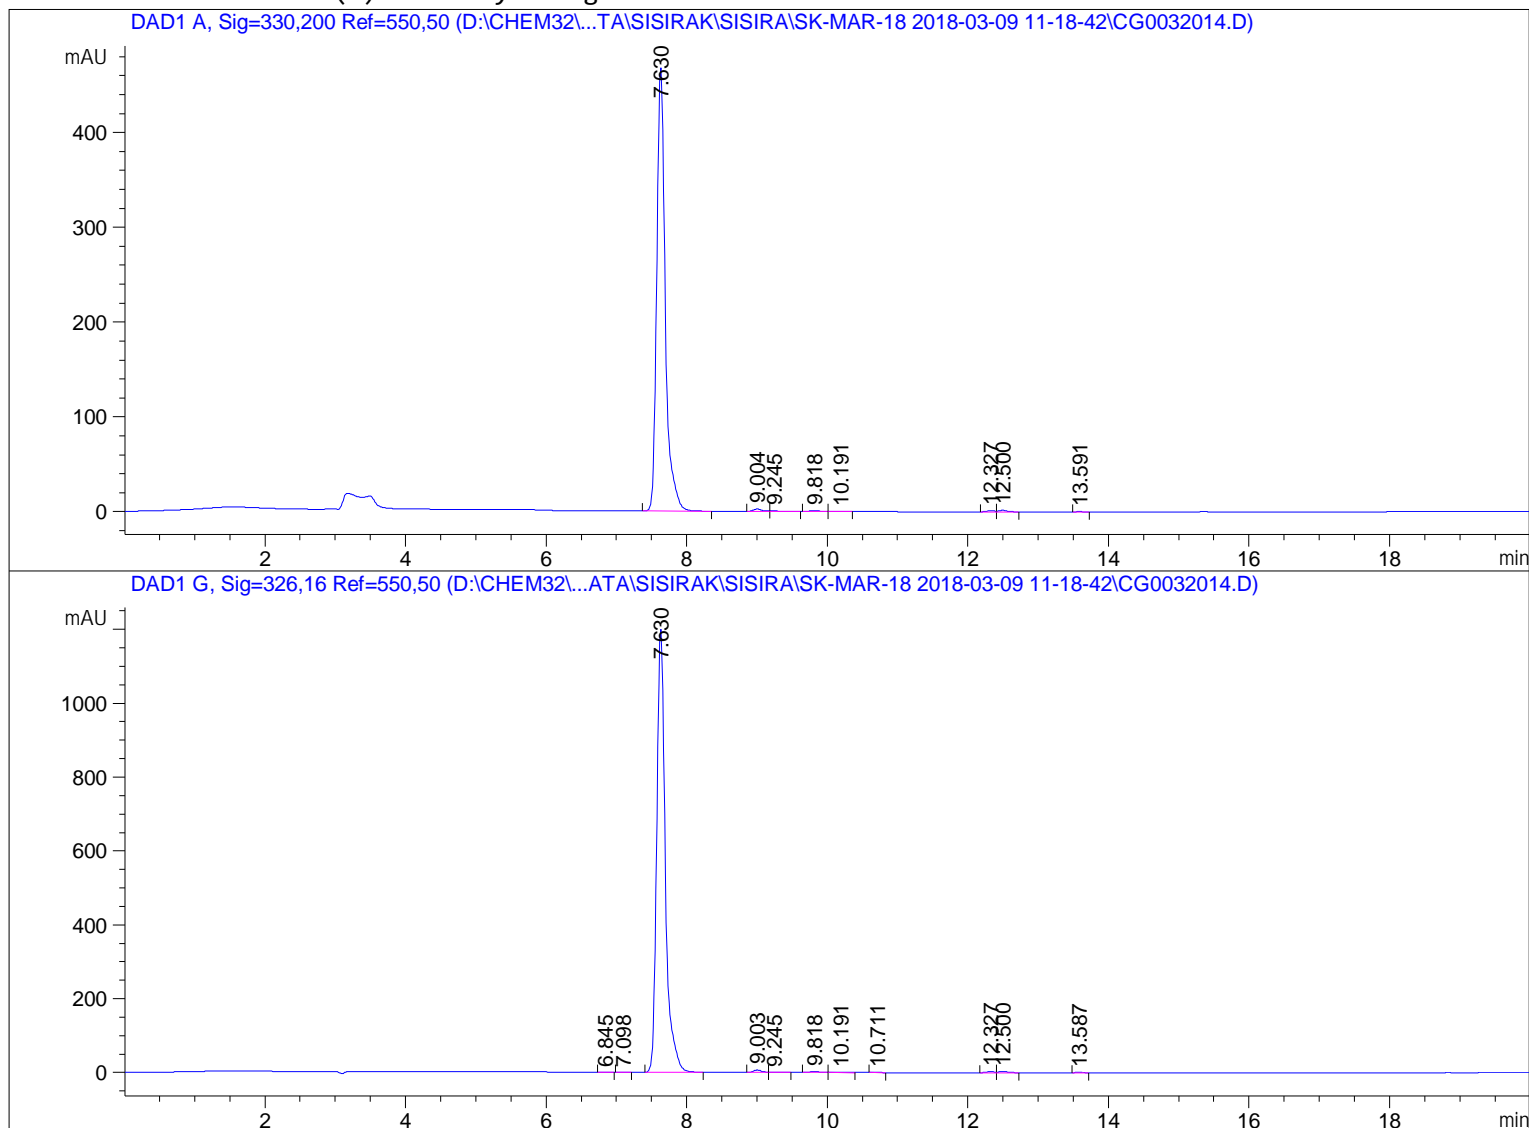

## Area Percent Report

Signal 1: DAD1 A, Sig=330,200 Ref=550,50

| Peak # | RetTime [min] | Type | Width [min] | Area [mAU*s] | Height [mAU] | Area %  |
|--------|---------------|------|-------------|--------------|--------------|---------|
| 1      | 7.630         | MM   | 0.1395      | 3925.43115   | 469.09988    | 98.3915 |
| 2      | 9.004         | MF   | 0.1371      | 21.19360     | 2.57715      | 0.5312  |
| 3      | 9.245         | FM   | 0.1430      | 4.14336      | 4.82906e-1   | 0.1039  |
| 4      | 9.818         | MF   | 0.1608      | 10.54772     | 1.09347      | 0.2644  |
| 5      | 10.191        | FM   | 0.1852      | 4.00984      | 3.60831e-1   | 0.1005  |
| 6      | 12.327        | BV   | 0.1165      | 8.95267      | 1.18076      | 0.2244  |
| 7      | 12.500        | VB   | 0.1266      | 12.95241     | 1.53330      | 0.3247  |
| 8      | 13.591        | MM   | 0.1254      | 2.37355      | 3.15503e-1   | 0.0595  |

Totals : 3989.60430 476.64380
